# Supplementary material for: Characterisation of three fungal glucuronoyl esterases on glucuronic acid ester model compounds
Source: PubMed Central journal article supplement (PMC5486812; doi:10.1007/s00253-017-8266-9), 2017-04-20
Supplement: 253_2017_8266_MOESM1_ESM.pdf [file 253_2017_8266_MOESM1_ESM.pdf]

## **Applied Microbiology and Biotechnology**

### **Electronic supplementary material for**

#### **Characterisation of three fungal glucuronoyl esterases on glucuronic acid ester model compounds**

Silvia Hüttner<sup>a,b\*</sup>, Sylvia Klaubauf<sup>a,b\*</sup>, Ronald P. de Vries<sup>c</sup>, Lisbeth Olsson<sup>a,b#</sup>

<sup>a</sup> Division of Industrial Biotechnology, Department of Biology and Biological Engineering, Chalmers University of Technology, SE-412 96 Gothenburg, Sweden

<sup>b</sup> Wallenberg Wood Science Center, Chalmers University of Technology, SE-412 96 Gothenburg, Sweden

<sup>c</sup> Fungal Physiology, CBS-KNAW Fungal Biodiversity Centre & Fungal Molecular Physiology, Utrecht University, 3584 CT Utrecht, The Netherlands

# Corresponding author: [lisbeth.olsson@chalmers.se](mailto:lisbeth.olsson@chalmers.se), tel: +46-(0)31-772-1000, fax: +46-31-772-3801

\* These authors contributed equally to this work

## **Material and methods**

### **Protein identification**

For peptide sequencing, purified AaGE1 was digested with either trypsin or chymotrypsin using the filter-aided sample preparation (FASP) method (Wiśniewski et al. 2009). Samples were desalted using PepClean C18 spin columns (Thermo Fisher Scientific) according to the manufacturer's guidelines prior to analysis on Orbitrap Fusion Tribrid mass spectrometer (Thermo Fisher Scientific) interfaced with Easy nLC I000 liquid chromatography system. Peptides were separated using an in-house constructed C18 analytical column (300x0.075 mm I.D., 3 µm, Dr. Maisch, Germany) using a gradient from 5% to 25% acetonitrile in 0.1% formic acid for 30 min and finally from 25% to 80% acetonitrile in 0.1% formic acid for 5 min. Precursor ion mass spectra were acquired at 120 000 resolution and MS/MS analysis was performed in a data-dependent mode where CID spectra of the most intense precursor ions were recorded in ion trap at collision energy setting of 30 for 3 s ('top speed' setting). Charge states 2 to 7 were selected for fragmentation, dynamic exclusion was set to 30 s.

Data analysis was performed utilizing Proteome Discoverer version 1.4 (Thermo Fisher Scientific) against a database including the protein sequence. Mascot 2.3.2.0 (Matrix Science) was used as a search engine with precursor mass tolerance of 5 ppm and fragment mass tolerance of 500 mmu. Tryptic and semi-tryptic (peptide with one tryptic and one non-enzymatic cleavage site) peptides were accepted with one missed cleavage, while for chymotrypsin three missed cleavages were accepted. Methionine oxidation and cysteine alkylation were set as variable modifications. The detected peptide threshold in the software was set to 1% false discovery rate by searching against a reversed database and identified proteins were grouped by sharing the same sequences to minimise redundancy.

**Table S1. Proteins used for phylogenetic analysis.**

| Protein                                                                                     | Organism                                          | Phylum <sup>1</sup> | Order, family (according to NCBI Taxonomy/Browser) | Locus tag/protein ID <sup>2</sup>                       | CBM <sup>4</sup> | Uniprot ID | Reference                         |
|---------------------------------------------------------------------------------------------|---------------------------------------------------|---------------------|----------------------------------------------------|---------------------------------------------------------|------------------|------------|-----------------------------------|
| <i>A) Previously characterised CE15 proteins (in chronological order).</i>                  |                                                   |                     |                                                    |                                                         |                  |            |                                   |
| Gp2                                                                                         | <i>Tetrahedrona reesei</i>                        | A                   | Hypocerales, Hypoceraaceae                         | AAP57749                                                | CBM1             | G08V93     | Li et al., 2007                   |
| PcGE1                                                                                       | <i>Phanerochaete chrysosporium</i>                | B                   | Polyporales, Phanerochaetaceae                     | igj130517 v. Pchnt1, igj3007273 v. Pchnt2               | CBM1             | POCT87     | Duranová et al., 2009a,b          |
| PcGE2                                                                                       | <i>Phanerochaete thermophila</i>                  | A                   | Sordariales, Chaetomiaceae                         | igj6482 v. Pchnt1, igj2912243 v. Pchnt2.2               | CBM1             | POCT88     | Duranová et al., 2009a,b          |
| SGE2                                                                                        | <i>Myceliophora thermophila</i>                   | A                   | Sordariales, Chaetomiaceae                         | MYCTH_55568, igj2508381 v. Spoth2                       | CBM1             | G2QJR6     | Topakas et al., 2010              |
| PcGCE                                                                                       | <i>Phanerochaete carnosa</i>                      | B                   | Polyporales, Phanerochaetaceae                     | AFM93784, igj247750 v. Pheal1                           | CBM1             | K5XJZ6     | Tsai et al., 2012                 |
| rSGE                                                                                        | <i>Schizophyllum commune</i>                      | B                   | Agaricales, Schizophyllaceae                       | XP_003026289, igj238770 v. Schco1, igj2754043 v. Schco3 | CBM1             | D8QLP9     | Wong et al., 2012                 |
| PcGE1                                                                                       | <i>Podospora anserina</i>                         | A                   | Sordariales, Lasiosphaeriaceae                     | XP_001903136, igj2637 v. Podan2                         | CBM1             | B2AB50     | Katsimpouras et al., 2014         |
| CuGE                                                                                        | <i>Cerrera unicolor</i>                           | B                   | Polyporales, Polyporaaceae                         | AIY68500, igj364105 v. Ceru2                            | CBM1             | AOA0A7EQR3 | d'Errico et al., 2015             |
| cssA                                                                                        | <i>Ruminococcus flavefaciens</i>                  | Bac                 | Firmicutes, Clostridiales, Ruminococcaceae         | CABS5548                                                | CBM1             | Q9RLR8     | Blely et al., 2015                |
| MZ0003                                                                                      | uncultured bacterium                              | Bac                 |                                                    | CDW92038                                                |                  |            | deSanti et al., 2016              |
| NcGE                                                                                        | <i>Neurospora crassa</i>                          | A                   | Sordariales, Sordariaceae                          | NCU09445.7                                              |                  | Q7S1X0     | Huyhn et al., 2016                |
| <i>B) CE15 proteins selected in this study (in alphabetical order).</i>                     |                                                   |                     |                                                    |                                                         |                  |            |                                   |
| AgGE1                                                                                       | <i>Acremonium alcalophilum</i>                    | A                   | Glomeriales, Pectosphaeriaceae                     | AO172113.1, igj1078265 v. Acm12                         | CBM1             |            | this study                        |
| LGGE1                                                                                       |                                                   |                     |                                                    | igj384728 v. Lem1I                                      |                  |            | this study                        |
| LGGE2                                                                                       | <i>Lentithectium flavitale</i>                    | A                   | Pleosporales, Lentithectiaceae                     | igj311197 v. Lem1I                                      |                  |            | this study                        |
| LGGE3                                                                                       |                                                   |                     |                                                    | igj349146 v. Lem1I                                      |                  |            | this study                        |
| PcGE1                                                                                       | <i>Phanerochaete chrysosporium</i>                | B                   | Polyporales, Phanerochaetaceae                     | igj130517 v. Pchnt1, igj3007273 v. Pchnt2               | CBM1             | D8QLS2     | Martinez et al., 2004, this study |
| ScGE2                                                                                       | <i>Schizophyllum commune</i>                      | B                   | Agaricales, Schizophyllaceae                       | igj2517462 v. Schco3                                    |                  |            | Ohm et al., 2010, this study      |
| WcGE1                                                                                       | <i>Wolffporia cocos</i>                           | B                   | Polyporales, Cortolaceae                           | BK009982, igj23632 v. Wolco1                            |                  |            | Floudas et al., 2012, this study  |
| <i>C) Additional CE15 proteins covering a wide taxonomic range (in alphabetical order).</i> |                                                   |                     |                                                    |                                                         |                  |            |                                   |
|                                                                                             | <i>Acremonium alcalophilum</i>                    | A                   | Glomeriales, Pectosphaeriaceae                     | Acral2_1078978 <sup>3</sup>                             |                  | AOA177DLU8 |                                   |
|                                                                                             |                                                   |                     |                                                    | XP_018385058                                            |                  |            |                                   |
|                                                                                             | <i>Alternaria alternata</i>                       | A                   | Pleosporales, Pleosporaceae                        | EGX47404                                                | CBM1             | G1XHL6     | Nierman et al., 2005              |
|                                                                                             | <i>Arthrospora oligospora</i>                     | A                   | Orthiales, Orthiaceae                              | EDP55347, igj99197 v. Aspfl_A11163_1                    | CBM1             | BOXMA3     |                                   |
|                                                                                             | <i>Aspergillus fumigatus</i>                      | A                   | Eurotiales, Aspergillaceae                         | KDQ18272                                                | CBM1             | AOA067N2B1 |                                   |
|                                                                                             |                                                   |                     |                                                    | KDQ11090                                                | CBM1             | AOA067M8Q8 |                                   |
|                                                                                             | <i>Botryobasidium botryosum</i>                   | B                   | Cantharellales, Botryobasidiaceae                  | KDQ19074                                                | CBM1             | AOA067MTY7 |                                   |
|                                                                                             |                                                   |                     |                                                    | igj392659 v. Ceru2                                      |                  |            |                                   |
|                                                                                             | <i>Cerrera unicolor</i>                           | B                   | Polyporales, Polyporaaceae                         | XP_011114526                                            | CBM1             | S8A3X4     |                                   |
|                                                                                             | <i>Dactyloctenium aegyptium</i>                   | A                   | Orthiales, Orthiaceae                              | XP_008087696, GLAREA_02289                              |                  | S3CIR1     |                                   |
|                                                                                             | <i>Glarea lozoyensis</i>                          | A                   | Helotiales, Helotiaceae                            | XP_008084971, GLAREA_04403                              |                  | S3CM63     |                                   |
|                                                                                             | <i>Gryllota frondosa</i>                          | B                   | Agaricales, Schizophyllaceae                       | OBZ79634                                                |                  |            |                                   |
|                                                                                             | <i>Leptosphaeria maculans</i>                     | A                   | Pleosporales, Leptosphaeriaceae                    | XP_003844265, LEMA_P019160.1                            |                  | E5AAU5     |                                   |
|                                                                                             |                                                   |                     |                                                    | CBX90574                                                |                  | E4ZH04     |                                   |
|                                                                                             | <i>Magnaporthe oryzae</i>                         | A                   | Magnaporthales, Magnaporthaceae                    | MGG_03128                                               |                  | G4NAW0     |                                   |
|                                                                                             | <i>Myceliophora thermophila</i>                   | A                   | Sordariales, Chaetomiaceae                         | MYCTH_96309, igj2119719 v. Spoth2                       |                  | G2QI15     | Berka et al., 2011                |
|                                                                                             | <i>Neofusicoccum parvum</i>                       | A                   | Botryosphaerales, Botryosphaeriaceae               | XP_007585921                                            |                  | RIEGG4     |                                   |
|                                                                                             | <i>Oridodendron matus</i>                         | A                   | Leotiomycetes, Myxotrichaceae                      | KIN02722, igj40592 v. Oridnal                           | CBM1             | AOA0C3HK64 | Kohler et al., 2015               |
|                                                                                             |                                                   |                     |                                                    | Oidnal_44280 <sup>3</sup>                               |                  |            |                                   |
|                                                                                             | <i>Parasitagonospora nodorum</i>                  | A                   | Pleosporales, Phaeosphaeriaceae                    | SNCG_09306, igj2908 v. Sann2                            |                  | Q0UC08     |                                   |
|                                                                                             | <i>Penicillium chrysogenum</i>                    | A                   | Eurotiales, Aspergillaceae                         | Pc13g07350, CAP91804                                    |                  | B6H3U7     |                                   |
|                                                                                             | <i>Piriformospora indica / Serendipita indica</i> | B                   | Sebacinales, Serendipitaceae                       | CCA74892, PIN_08862                                     | CBM1             | G4TU99     |                                   |
|                                                                                             | <i>Phanerochaete chrysosporium</i>                | B                   | Polyporales, Phanerochaetaceae                     |                                                         |                  |            |                                   |
|                                                                                             |                                                   |                     |                                                    | Pheal_15704 <sup>4</sup>                                |                  |            |                                   |
|                                                                                             |                                                   |                     |                                                    | Pheal_17928 <sup>5</sup>                                |                  |            |                                   |
|                                                                                             | <i>Podospora anserina</i>                         | A                   | Sordariales, Lasiosphaeriaceae                     | PODANS_5_11620, igj7888 v. Podan2                       |                  | B2AP18     | Espagne et al., 2008              |
|                                                                                             | <i>Pseudogymnoascus verrucosus</i>                | A                   | Leotiomycetes, Pseudourtiaceae                     | Pa_1_780, igj25 v. Podan2                               | CBM1             | AOA090C6G6 | Espagne et al., 2008              |
|                                                                                             | <i>Rhizidhysterium trifolium</i>                  | A                   | Hysteriales, Hysteriaceae                          | XP_018132613, VF01_03452                                |                  |            |                                   |
|                                                                                             |                                                   |                     |                                                    | igj111612 v. Rhyru1_1                                   |                  |            | Ohm et al., 2012                  |
|                                                                                             |                                                   |                     |                                                    | igj116370 v. Rhyru1_1                                   |                  |            |                                   |
|                                                                                             | <i>Sugiyamaella lignohabians</i>                  | A                   | Saccharomycetales, Trichomonasaceae                | ANB15160, AVJ20_2784                                    |                  | AOA161HH17 |                                   |

<sup>1</sup> A: Ascomycota, B: Basidiomycota, Bac: Bacteria

<sup>2</sup> Protein identifiers are given: NCBI accession numbers or locus tags, or U.S. Department of Energy Joint Genome Institute (DOE JGI) identifiers including genome version

<sup>3</sup> These proteins were not included in the final phylogenetic tree, because their gene models could not be verified

<sup>4</sup> CBM: carbohydrate-binding module

### AaGE1 (full length)

Length: 496 aa

Molecular weight (incl. signal peptide, excl. N-glycans): 51.6 kDa

Molecular weight (excl. signal peptide, excl. N-glycans): 49.8 kDa

```
> AaGE1
1 MKSTVASALILVLAGTAVQAQSGPMPQCCGGIGWQGGFETCVSGHTCOVLNDWYHQCVPGGGFSPPPTSPPPTTPEPT
76 SPPPTSPPPTSPPPPTSPPPTSPPPPTSPPPTSPPPPTSPPPTSPPPPTSPPPTSPPPPTSPPPTSPPPPTSPPPTSPPPPTS
151 NGNTVTSAADFQCRQREVSSLIQQYELGQFPAPPQSVTSSYSNGTNTLSTVTSVQGRSISFVSISGGSGSKSPAII
226 AYGAPSIIPVFNQVATIRFNNDIIAAQQSGSSRGQGFYNYLGSAGAMTAWAWGVARIIDALEKTPAAGIDPDT
301 RVGVGTCSRNGKAMVAGALEPRIALTIIPQESGSGGSACWRI SNWQGGQGNVQTPAQIITENVVLGPVFNHNM
376 NVNALPFDHHLQAGLITAPRALYVIENSDEWLGWATYQGCMAAARTQWEALGALDNDFGFSQVGGNQHCSFNSGKQ
451 SAELNAFINKFLIQSGGGTTSILRTERNHGSFNLAEWTPWNVPLR*
```

### LfGE1 (full length)

Length: 404 aa

Molecular weight (incl. signal peptide, excl. N-glycans): 43.1 kDa

Molecular weight (excl. signal peptide, excl. N-glycans): 41.3 kDa

```
> LfGE1
1 MRSDILTFAALLVAAHGAPTPESEVFERMLDILLRQAIVTCTPATPNMPKAAACPSVKTMPDFFLYLDGKTRVQSK
76 EEWYQCRQPEIMKLLQEQYQYYPDHSKETVTATRSKTKLDVSIATGGKTATISATVNLPSGTGPPFVVAIGGI
151 DNSYLKAGIAVVTFFDYKVAADSNSKTGFWTLYNGKDIGVLTAWAWGFHRVLDGIELKVPVIDAKKSGVTGCS
226 RLKGAALAAGLFDARIAVTMPMCSGVQAGPYRYSLSGQGENLENSKSGAGWWTSSGISQFVGKSTQLPYDAHTI
301 VAAIAPRAVILEQASDQFTDSKGTATVTFPAKAVYNWLVGVPQLGMAIPKGGHCDMSGYADVLPFVQKILQGK
376 TTRNYDDLGSWKAMPEAYFWATDLPKPK*
```

### LfGE2 (full length)

Length: 388 aa

Molecular weight (incl. signal peptide, excl. N-glycans): 40.5 kDa

Molecular weight (excl. signal peptide, excl. N-glycans): 38.7 kDa

```
> LfGE2
1 MKYSIILPPLATTVLAAPLESRQAACNVPTTFPTTANSKLPNPFKFFNGGDVKTADFECKNKEVSAAIQAQELG
76 VFPPKPTVTASLSGSTLSISSTEGGKTVSFTVSIKTPSGNGPFPALIAAGASIPVPAGVATITFNNDNIGAQQ
151 GQSSRRGQKFFDLYGSGHSAGALTAWAWGVDVMDALEATSATKIDPKRVGVTGCSRNGKGFVAAALVGRIALG
226 LPQESGSGGAACWRVSDSEKAKKNIQTASQIVGENVWFVSKNFNASTKANTLATDHHQLAGMVAPRGLLVIENE
301 IDWLVGVSITACMKAGRLIYKALGVDPNMGFTGSGNHACQFSPNQSSDLTAYINKFLIQDANTANIEKGPSAD
376 VASYIDWTAFTLT*
```

### LfGE3 (full length)

Length: 387 aa

Molecular weight (incl. signal peptide, excl. N-glycans): 42.2 kDa

Molecular weight (excl. signal peptide, excl. N-glycans): 40.5 kDa

```
> LfGE3
1 MLALLLPLLFVPSLQAPSPCNLPASINYAANPLPDPFLALSGTRLSKDDQWPCRKEEIRQLFQRYSYGTFFP
76 RPESVTAAMSGNALKITVSEGSKSMFSVNIKLPSSGAAFPYPAIIAYGASALPIPNVTATITTYQNFEMAADNRRG
151 KGKFEYFYGSNHNAGMIAAAGVDRIIDALEMTPAAKIDPKRVGVTGCSRNGKGSMIAGAFVDRIALALPQEGG
226 QSAAGCWRIADEIQKGTQVETAHQIVNGDSWFSDFSKYVDTVPTLPWDNHLHALYAYPPRGLLIIENTAIDY
301 LGPTSNYHCATAGRVHEALGVKDYFGFSQNSHSDHCGFPKAAQPELTAFIERFLIAKDKTVDVWKTGDKFTIDE
376 RRWIDWAVPSLS*
```

### PcGE1 (full length)

Length: 472 aa

Molecular weight (incl. signal peptide, excl. N-glycans): 49.2 kDa

Molecular weight (excl. signal peptide, excl. N-glycans): 47.2 kDa

```
> PcGE1
1 MKSAAYLAALAAVLPAYVNAQAQEWGQCCGIGTIGATTCVSGTIVCTVLNEYVQCLPGTATTAPPPTPPPTSVS
76 SSSSSSTSSAPPSPGSGTSPCTCSVASTIPGFSNAA LPNPFVFDGSPVQSKADFTCRQQQIILALIQGYEAGALPG
151 PPQSVTASFSKSGSTGLTITVTDNGKSTISFAPTTISIPSGTTPANGWLVIAFEGGSIPI PAGIAKLTYSNSDMA
226 QQTDTSSRGKGLFYNLYGSGGATASAMTAWAWGVSRIIDALEKTPSAQINTQRIAVTGCSSRDGKALMAGALEPRI
301 ALTIIPQESGSGGDTWCRLSKAESDQGHQVQATEIIVTENVWFSTNFNYYVNNLVLPYDHHMLMALVAPRALVSF
376 ENTDTYTWLSPMSAWGCVNAAHVTFVFSALGVADHHGFAQVGGHACAWPDSLTPSLNAFFNRFLIQDQVNDTVNFTTN
451 NQFGGATWTQSSWINWSTPTLS*
```

### ScGE2 (full length)

Length: 389 aa

Molecular weight (incl. signal peptide, excl. N-glycans): 41.6 kDa

Molecular weight (excl. signal peptide, excl. N-glycans): 39.5 kDa

```
> ScGE2
1 MLLASLVLTFFFPERARAQAELPSTLPGVDDLDALNITLFPDFTFYVGTPLSSVDDWACRQEQEIKQLVQHYFYGY
76 LPDTSDEANPPLQTVTAKLSSGQGTLAITIASGSKSASFNATLTLPSGASADAPVPAIITLGGFGPSATGAAA
151 VSFDAASVAYDGPLKTTGAFWLDYEGDIGVLAAWGWGFSKIIDALEAAVPEVDIERIAVSGCSRYGKAALAAAGFFD
226 ERVTLTVPMSSGLMGMAPFRFQYEEENGANEQLSDMDDTSSSWPDDTLVSRFRNDPARLPVDSNFIITAGVAPRALIW
301 DEGTTDYWTNPEGTAAVTFPATLALYEWLWAGDNGVIALRNSGHCDPSGNTNVADFINKVFGTETDRDYHDISP
376 FTAHEETFFFAAPE*
```

### WcGE1 (full length)

Length: 408 aa

Molecular weight (incl. signal peptide, excl. N-glycans): 44.1 kDa

Molecular weight (excl. signal peptide, excl. N-glycans): 42.2 kDa

```
> WcGE1
1 MASSSRFAALLLLALPALLPSSQVVPRAACATPSTVPYNNDRLLPDPFLDGDGTAVTSSADWDCRRSQIAAVVQ
76 GYEAGYLPQPPIVSAFTSSSDGTGLTITVAGLSSDNTISFSEPIITYPSTGTAAGWPLVIAVDVLSIPVDPDGI
151 VMVYNNDDIAQENDLSSRRGVGLFYDLYGTDATASAMTAWVWGVSRIIDALETTPAANINTAKIAVTCSSRDGKGA
226 LMAGAFEPVALTIIPQESGSGGDTWCRLSKYEQDSGDVVQQAETIIVTENVWFSTNFDNYVMILSVLPYDHHELAA
301 MVAPRPLLSYENTYEWLSPLSAYGCMSAAHTVYEAALGIPDYHGFVQVGHSHCYFPDLDLDSLYAFFDRFLIID
376 DDVSTDYFTTNYQFGTVWVASYWIVWTPQLD*
```

Signal peptide (predicted by SignalP v4.1)  
CBM1 (predicted by dbCAN v4.0)  
Proline-rich linker region  
CE15 domain (predicted by dbCAN v4.0)  
N-glycosylation site (predicted by NetNGlyc 1.0)

Figure S1. Protein sequences and annotation of putative fungal GEs

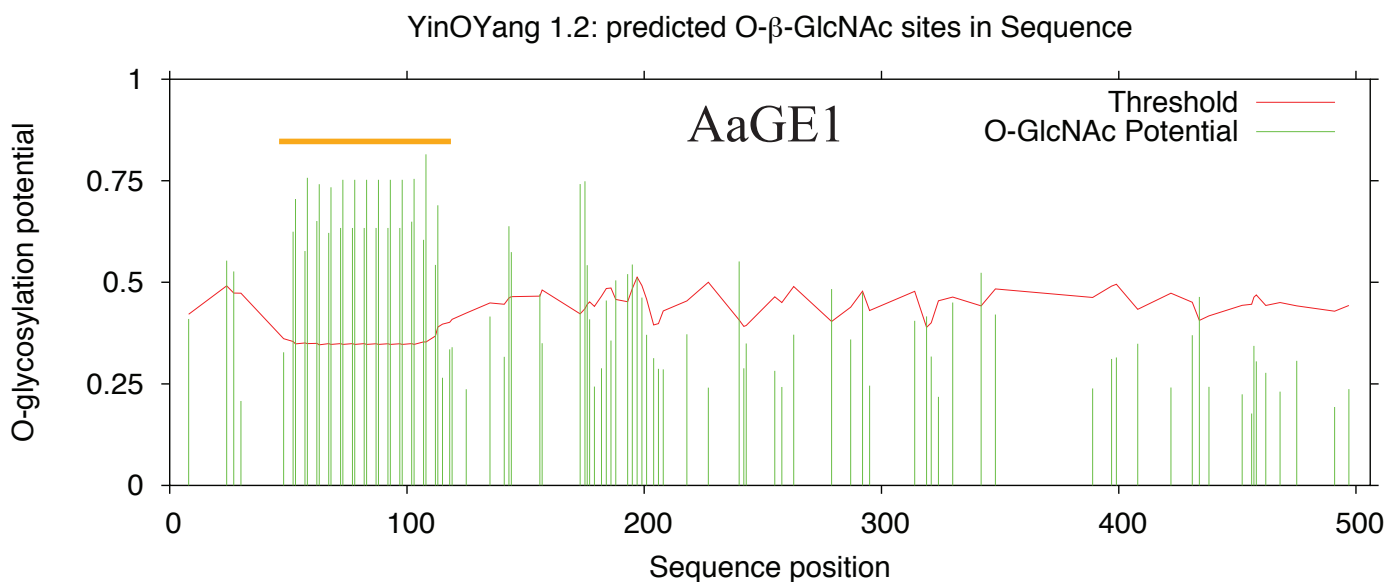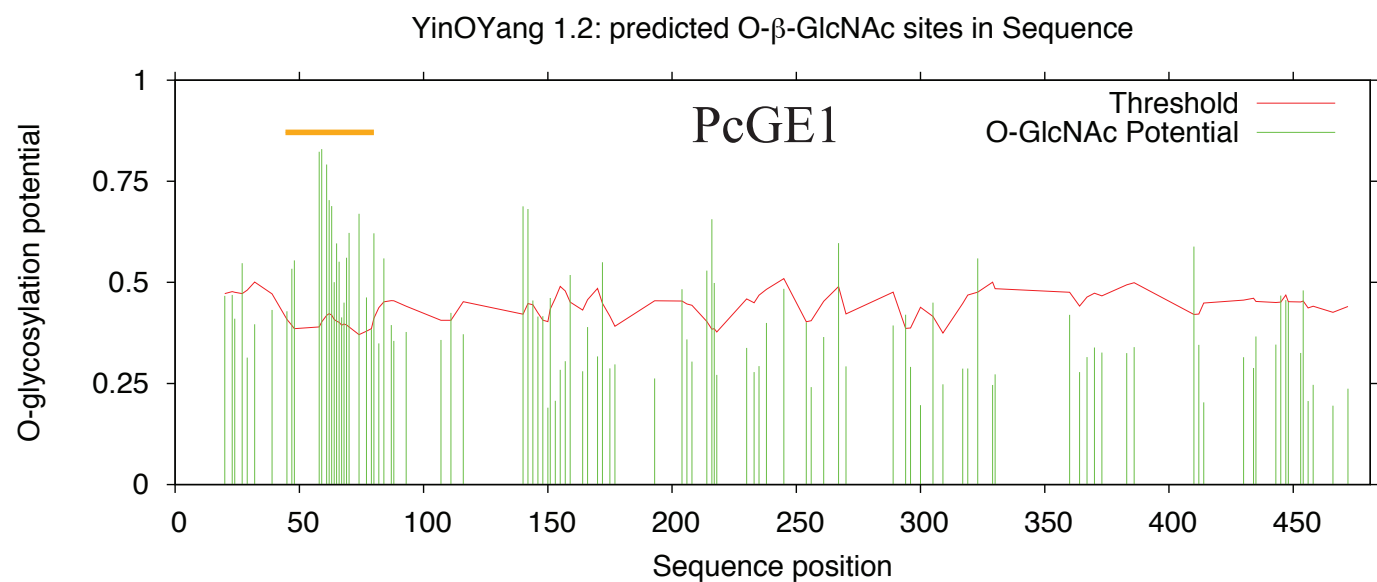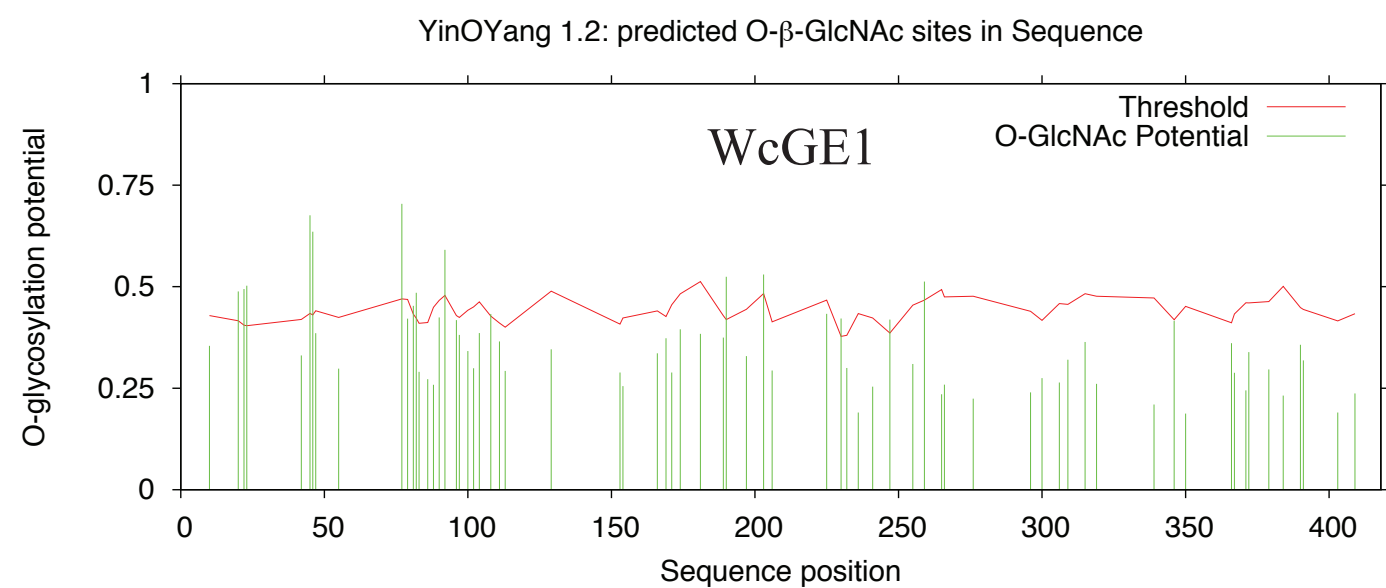

**Figure S2.** Prediction of O-glycosylation of GEs with YinOYang 1.2. The orange bar indicates the location of the proline-rich linker region between CBM1 and catalytic CE15 domain.



Colour assignments:

Unconserved 0 1 2 3 4 5 6 7 8 9 10 Conserved

|                 | ..... 10    | ..... 20     | ..... 30       | ..... 40   | ..... 50           |
|-----------------|-------------|--------------|----------------|------------|--------------------|
| PcGE1_JGI300727 | -----       | -----        | -----          | -----      | ---TC--SVAS        |
| ScGE1_XP_003026 | -----       | -----        | -----          | -----      | ---DC--DTPA        |
| PcGE2_JGI6482   | -----       | -----        | -----          | -----      | ---FC--STPS        |
| CuGE_AIY68500   | -----       | -----        | -----          | -----      | ---ACGAIAS         |
| WcGE1_JGI23632  | -----       | -----        | -----          | -----      | ---AC--ATPS        |
| AaGE1_JGI107826 | -----       | -----        | -----          | -----      | ---SCPSTPG         |
| Cip2_AAP57749   | -----       | -----        | -----          | -----      | ---TCSALPG         |
| JGI40592_Oidma  | -----       | -----        | -----          | -----      | ---TCTPLPS         |
| LfGE3_JGI349146 | -----       | -----        | -----          | -----      | ---SCPNLPA         |
| CCA74892_Serin  | -----       | -----        | -----          | -----      | ---SCTPLSG         |
| XP_011114526_Da | -----       | -----        | -----          | -----      | ---TCPAIPG         |
| PaGE1_XP_001903 | -----       | -----        | -----          | -----      | ---TCPNTPS         |
| EGX47404_Artol  | -----       | -----        | -----          | -----      | ---CSV--G          |
| KDQ19074_Botbo  | -----       | -----M       | SPLTSLFLLA     | L-PALTL    | ---AACDTPS         |
| KDQ11090_Botbo  | -----       | -----M       | PRLTSLVLLA     | L-PVLAL    | ---AQCDTPS         |
| PcGCE_JGI247750 | -----       | -----MAFRWLS | FLLLALPVLA     | L-PQTSS-KE | AQSFGCSTPA         |
| JGI392659_Cerun | MHLAKQK RTP | KRTMFLNLF    | QLALVAGLVI     | ALPPQEP-SS | EASQFCSTPS         |
| ANB15160_Sugli  | -----       | -----MKLNNLF | LLSLITNVFG     | AAVELDERNG | GGIGLTLNLPY        |
| XP_007585921_Ne | -----       | -----MKRWECI | LNCSVISICT     | LRQV       | -----SSK           |
| NcGE_NCU09445   | -----       | -----MVHLTPA | LLLASAAFAA     | AAPASQI    | -F E-RQC-SVAG      |
| JGI7888_Podan   | -----       | -----MVHLASA | LLVASAAFAV     | AAPANEI    | -F ERQTC-SVQA      |
| XP_003844265_Le | -----       | -----MKYSIIL | PFLATTVLTA     | PVLEQRQ    | -D N-VC--TVPT      |
| XP_018385058_Al | -----       | -----MKYSLVL | PLLATTVLAA     | PAIEQRQ    | -D A-TC--NVPT      |
| SNOG_09306_Parn | -----       | -----MKYSIVL | PLLATTVLAA     | PVIEERQ    | -E A-ACP-AIPS      |
| Rhyru1_111612   | -----       | -----MKYIVPL | LASTALAAPL     | SPASSLF    | -E KRQDTCATPS      |
| XP_008084971_Gl | -----       | -----MVSLLAT | VLCLAVAPLA     | TAYPKAE    | -A VEARCGNIPS      |
| XP_008087696_Gl | -----       | -----MKSIVSS | ALLLALPVFA     | LPSSLHE    | -R -QDACKALPA      |
| Rhyru1_116370   | -----       | -----MAFMVAL | LFYLGFP LLP    | QARPASS    | -E VLAACPSVPS      |
| XP_018132613_Ps | -----       | -----TNPPATL | PPSETTTATG     | GTPSTCP    | -T -----IPG        |
| JGI199197_Aspfu | -----       | -----MFLF    | PVLLSLISSG     | ALAATCP    | -S -----LPS        |
| Pc13g07350_Penr | -----       | -----MMFLY   | PVLLSLISSG     | ALAATCP    | -S -----LPS        |
| LfGE2_JGI311197 | -----       | -----        | -----          | -----ACN   | -----VPT           |
| StGE2_JGI230838 | -----       | -----        | -----          | -----TCS   | -----VSD           |
| MGG_03128_Magor | -----       | -----        | -----MPASAI FS | RQEATCS    | -----TPT           |
| AOA090CBG6_Poda | -----       | -----MRYSI   | LFTAATAAVL     | SAAAPASSEN | DQEISPRQVQ         |
| MYCTH_96309_Myc | -----       | -----MKLVS   | AYTLIGAAIG     | SASRVPRI   | -P RQGGGNTMIE      |
| CBX90574_Lepma  | -----       | -----SQGTPI  | ALNDLPPQLE     | LVPRQANI   | -----T CPPTPNPMPK  |
| OBZ79634_Grifr  | -----       | -----MV      | GVFIITSALV     | YAAVASAA   | -----A CPRLPNPLPT  |
| LfGE1_JGI384728 | -----       | -----        | -----          | -----      | -----T CPATPNPMPK  |
| KDQ18272_Botbo  | -----       | -----RPTTS   | TTQGGSP T      | -----      | -----N CPALPATFPN  |
| ScGE2_JGI251746 | -----       | -----        | -----          | -----      | -----Q CAELPSTLPG  |
| CAB55348_Rumfl  | -----       | -----        | -----          | -----      | -----P VFEKSYNFLPA |
| MZ0003_CDW92038 | -----       | -----MQRTC   | VLIVLIVTST     | MWTPDPDVYA | QPRGFNY            |
| Consistency     | 0000000000  | 0001000111   | 1111111101     | 1001101001 | 0002213575         |

|                 | ..... 60 | ..... 70 | ..... 80   | ..... 90 | ..... 100 |             |
|-----------------|----------|----------|------------|----------|-----------|-------------|
| PcGE1_JGI300727 | TIPGFS   | -NAA     | LPNPFVFN D | -----    | -----GS   | ---PVQSKAD  |
| ScGE1_XP_003026 | TVSGYS   | -NSA     | LPDPFTFND  | -----    | -----GS   | ---PVTTAED  |
| PcGE2_JGI6482   | NIPF-N   | -DDK     | LPDPFKFND  | -----    | -----GS   | ---PVRSFAD  |
| CuGE_AIY68500   | TVPNYN   | -NAK     | LPDPFTFAN  | -----    | -----GT   | ---ALRTKAD  |
| WcGE1_JGI23632  | TVPGYN   | -NDR     | LPDPFLFDD  | -----    | -----GT   | ---AVTSSAD  |
| AaGE1_JGI107826 | GLGS-G   | -NQR     | LPDPFTFHN  | -----    | -----GN   | ---TVTSAAD  |
| Cip2_AAP57749   | SITLRS   | -NAK     | LNDLFTMFN  | -----    | -----GD   | ---KVTTKDK  |
| JGI40592_Oidma  | SITLQA   | -DSK     | LNDLFTMFN  | -----    | -----GN   | ---KVTTKDQ  |
| LfGE3_JGI349146 | SINYAA   | -NPK     | LPDPFLALS  | -----    | -----GT   | ---RLSKKDQ  |
| CCA74892_Serin  | NPTSST   | -IPK     | LPDPFORAS  | -----    | -----GS   | ---RVTTKAE  |
| XP_011114526_Da | SIPLVS   | -NSK     | LPDPFTFVS  | -----    | -----GA   | ---KVTTKDQ  |
| PaGE1_XP_001903 | GLGTPV   | -ANQ     | LNDPFTFHN  | -----    | -----GN   | ---KVTSKAD  |
| EGX47404_Artol  | SISLVS   | -NSK     | LPDPFTFAN  | -----    | -----GQ   | ---KVTTKEQ  |
| KDQ19074_Botbo  | TLPSFT   | -NDN     | LPDPFLFSN  | -----    | -----GN   | T---RTATVDD |
| KDQ11090_Botbo  | TLPSFT   | -NDN     | LPDPFLFPD  | -----    | -----GR   | ---RTATVND  |
| PcGCE_JGI247750 | NIP-FN   | -DDK     | LPDPFLFND  | -----    | -----GT   | ---PVRSLTD  |
| JGI392659_Cerun | FIPHFN   | -DTK     | LPNPFLLNN  | -----    | -----GQ   | ---RVRTKND  |
| ANB15160_Sugli  | PLPY YE  | -NPL     | LPDPFSSAL  | -----    | -----TG   | R---RATNKQQ |

|                 |        |      |            |            |             |          |            |            |  |
|-----------------|--------|------|------------|------------|-------------|----------|------------|------------|--|
| XP_007585921_Ne | NDPLEE | -TAK | LPDPFTFAN  | -----      | -----       | GT       | ---        | QVTTKSA    |  |
| NcGE_NCU09445   | NYPTAA | -VSK | LPDPFTTAA  | -----      | -----       | GQ       | ---        | KITTKAD    |  |
| JGI7888_Podan   | NYPTQN | -NSK | LPDPFTSAS  | -----      | -----       | GQ       | ---        | KITTKAD    |  |
| XP_003844265_Le | TFPPTA | -NAK | LPNPFKFFD  | -----      | -----       | GR       | ---        | DVTKKAD    |  |
| XP_018385058_Al | TFPPTA | -NAK | LPNPFKFFD  | -----      | -----       | GR       | ---        | AVATKAD    |  |
| SNOG_09306_Parn | TFPSAT | -NAK | LPNPFKFFD  | -----      | -----       | GT       | ---        | AVTTKAQ    |  |
| Rhyru1_11612    | TAPTTS | -NAK | LPDPFTFID  | -----      | -----       | GK       | ---        | KVTTKAE    |  |
| XP_008084971_Gl | NYQPPS | -ITT | LPDPFTFIN  | -----      | -----       | GD       | ---        | RVKSKRD    |  |
| XP_008087696_Gl | NYAYSP | ASSK | LPDPFTFAD  | -----      | -----       | GT       | ---        | KVTTKAQ    |  |
| Rhyru1_116370   | NPAYSA | -NTK | LPDPFLSIS  | -----      | -----       | GS       | ---        | KVTTKDD    |  |
| XP_018132613_Ps | SINPPS | -VAT | LNDPFTPLS  | -----      | -----       | GS       | ---        | RITTKAQ    |  |
| JGI99197_Aspfu  | SPQLQS | -ITT | LPDPFSWYP  | -----      | -----       | LQ       | KTGRVSTLSD |            |  |
| Pc13g07350_Penr | SPQLQS | -ITT | LPDPFSWHP  | -----      | -----       | LQ       | HSGRVSTLSD |            |  |
| LfGE2_JGI311197 | TFPPTA | -NSK | LPNPFKFFN  | -----      | -----       | GG       | ---        | DVTKKAD    |  |
| StGE2_JGI230838 | NYPTVN | -SAK | LPDPFTTAS  | -----      | -----       | GE       | ---        | KVTTKDQ    |  |
| MGG_03128_Magor | NFPAVS | -ERQ | LPDPWKMAS  | -----      | -----       | GK       | ---        | SVASAED    |  |
| AOA090CBG6_Poda | WQQLPL | -QSS | LPDPFLPLKY | TTTDNAAGSS | TFARDVMTGN  |          | APNRIRSRAE |            |  |
| MYCTH_96309_Myc | WQELPL | -QSS | MPDPFLPLAY | T-----     | TP DNAADVVA | GR       | GKGRVQTPEE |            |  |
| CBX90574_Lepma  | ASAFPS | -VKT | MPDPFFYLD  | -----      | -----       |          | GKTRVQSKDE |            |  |
| OBZ79634_Grifr  | VDGLPS | -IPT | LPDPWTFDD  | -----      | -----       |          | GT-PLRSPAD |            |  |
| LfGE1_JGI384728 | AAACPS | -VKT | MPDPFLYLD  | -----      | -----       |          | GKTRVQSKDE |            |  |
| KDQ18272_Botbo  | GASLPV | -TAT | LPDPWTFYG  | -----      | -----       |          | GS-KVTSKSQ |            |  |
| ScGE2_JGI251746 | VDDLDA | -LNT | LPDPFTFYN  | -----      | -----       | GT       | ---        | PLSSVDD    |  |
| CAB55348_Rumfl  | VNQLKS | -SKD | IPDPFIFMD  | -----      | -----       | GS       | ---        | KVESTDD    |  |
| MZ0003_CDW92038 | QVP--- | -KYT | LPDPFLVMD  | -----      | -----       | GT       | ---        | KVTSAKQ    |  |
| Consistency     | 444    | 335  | 0445       | 988985535  | 000000000   | 00000000 | 74         | 0005857556 |  |

|                                               |    |           |             |            |     |       |         |            |           |
|-----------------------------------------------|----|-----------|-------------|------------|-----|-------|---------|------------|-----------|
| ..... 110..... 120..... 130..... 140..... 150 |    |           |             |            |     |       |         |            |           |
| PcGE1_JGI300727                               | F  | TCRQQQIL  | ALIQQGYEAGA | LPGPP      | --Q | ---   | SVTASFS | KSG        | -----     |
| ScGE1_XP_003026                               | W  | ECRRSQIL  | ALIQQGYESGA | APPEP      | --E | ---   | SVTGTAT |            | -----     |
| PcGE2_JGI6482                                 | W  | DCRRQQLS  | ALIQQGYEAGT | LPPRP      | --P | ---   | VVTSTFT | KSG        | -----     |
| CuGE_AIY68500                                 | W  | SCRRAEIS  | ALIQNYEAGT  | LPPKP      | --P | ---   | VVTASFS | KSG        | -----     |
| WcGE1_JGI23632                                | W  | DCRRSQIA  | AVVQGYEAGY  | LPPQP      | --P | ---   | IVSATFS | SSD        | -----     |
| AaGE1_JGI107826                               | F  | QCRQREVS  | SLIQQYELGQ  | FPAPP      | --Q | ---   | SVTSSYS | G          | -----     |
| Cip2_AAP57749                                 | F  | SCRQAEMS  | ELIQRyelGT  | LPGRP      | --S | ---   | TLTASFS | G          | -----     |
| JGI40592_Oidma                                | W  | LCRQAEMS  | TLLQQYELGT  | LPGPP      | --A | ---   | TLTASLS | G          | -----     |
| LfGE3_JGI349146                               | W  | PCRKEEIR  | QLFQRYSYGT  | FPPRP      | --E | ---   | SVTAAMS | G          | -----     |
| CCA74892_Serin                                | W  | QCRREEIS  | QLMQTNELGT  | KPPKP      | --S | ---   | SVTGSMS | G          | -----     |
| XP_01114526_Da                                | F  | KCRQAEIL  | AAMSQYELGT  | KPPKP      | --Q | ---   | TVTASWS | G          | -----     |
| PaGE1_XP_001903                               | W  | ACRQREIS  | ELLQRYELGT  | LPPKP      | --S | ---   | SVTASFS | G          | -----     |
| EGX47404_Artol                                | F  | KCRQAEIS  | AAMQQYELGT  | KPGKP      | --Q | ---   | SLTASWS | G          | -----     |
| KDQ19074_Botbo                                | W  | TCRRSQIS  | ALIQQGYEAGT | LPEKP      | --A | ---   | TVTGSFS | KSG        | -----     |
| KDQ11090_Botbo                                | W  | QCRRSQLA  | ALIQQGYEAGS | IPGKP      | --T | ---   | TVTGSFT | KNG        | -----     |
| PcGCE_JGI247750                               | W  | SCRQQQLA  | SLIQQGYEAGT | LPPKP      | --P | ---   | IVTSTFS | QNG        | -----     |
| JGI392659_Cerun                               | W  | ACRRRQIS  | SLIQQGYEAGS | LPPRP      | --H | ---   | RLSGSFS | RSN        | -----     |
| ANB15160_Sugli                                | F  | ESLQQEQS  | LLFEATELGP  | MAVKP      | --D | ---   | RLHGSLD | ND         | -----     |
| XP_007585921_Ne                               | W  | ACRQQEIS  | QLFQTYELGA  | KPPKP      | --S | ---   | SVTSSLS | SN         | -----     |
| NcGE_NCU09445                                 | F  | DCRKAELS  | KILQQYELGT  | YPGKP      | --D | ---   | KVEGSLS | GN         | -----     |
| JGI7888_Podan                                 | F  | ECRQEEIS  | KIMQQYELGV  | YPPFP      | --D | ---   | SVTGTMS | GN         | -----     |
| XP_003844265_Le                               | F  | DCKNQEVs  | AAMQAQELGD  | FPKKP      | --S | ---   | SVTATFS | GS         | -----     |
| XP_018385058_Al                               | F  | ACKNKEVS  | AAIQAQELGD  | FPKKP      | --S | ---   | SVTATFS | GS         | -----     |
| SNOG_09306_Parn                               | F  | DCRNKEVS  | AAIQAQELGD  | FPKKP      | --S | ---   | SVTATFS | GT         | -----     |
| Rhyru1_11612                                  | W  | ECRQKELN  | WLIQKQELGE  | IPTTA      | --- | ---   | KTTGTVS | SS         | -----     |
| XP_008084971_Gl                               | F  | RCRQKEIA  | ALFARFELGD  | KPAAD      | --- | ---   | SVKGSFA | NN         | -----     |
| XP_008087696_Gl                               | W  | ACRKQEIL  | QLFYLQELGD  | KPAKP      | --E | ---   | SVTGTVS | AT         | -----     |
| Rhyru1_116370                                 | W  | ACRKEEIR  | KLYQDYQMG   | MPPKP      | --S | ---   | SVTTSFS | SN         | -----     |
| XP_018132613_Ps                               | W  | TCRQDEIK  | QLFQKYELGT  | LPPKP      | --S | ---   | SVTGSFS | GS         | -----     |
| JGI99197_Aspfu                                | W  | QCRQSHIS  | SLLQQLELGT  | KPPAP      | --S | ---   | SPKQTHH | HR         | -----     |
| Pc13g07350_Penr                               | W  | QCRQSHIS  | TLLQQLELGT  | KPPAP      | --S | ---   | SVTSTFS | QN         | -----     |
| LfGE2_JGI311197                               | F  | ECNKKEVS  | AAIQAQELGV  | FPPKP      | --S | ---   | TVTASLS | GS         | -----     |
| StGE2_JGI230838                               | F  | ECRRAEIN  | KILQQYELGE  | YGGPP      | --D | ---   | SVEASLS | GN         | -----     |
| MGG_03128_Magor                               | W  | TCRQAEMS  | KALQQYVLD   | YPPFP      | --D | ---   | SVTATST | AT         | -----     |
| AOA090CBG6_Poda                               | W  | YQCRQPEIL | QFLQYEQFGY  | YDPDTP     | --E | ---   | KVEATRS | GT         | -----     |
| MYCTH_96309_Myc                               | W  | YRCRQPEII | QLLQYEQYGY  | YDPDSE     | --E | ---   | KVEATRS | GN         | -----     |
| CBX90574_Lepma                                | W  | YQCRQPEIL | KLLQYEQYGY  | YPDHSQ     | --E | ---   | TVSATRS | GN         | -----     |
| OBZ79634_Grifr                                | W  | ACRREEVL  | TLVQQYFYGY  | YPDHSKE    | --E | ---   | RVHASRN | GT         | -----     |
| LfGE1_JGI384728                               | W  | YQCRQPEIM | KLLQYEQYGY  | YPDHSK     | --E | ---   | TVTATRS | GT         | -----     |
| KDQ18272_Botbo                                | W  | ACRKAELF  | KLLQYEQYGY  | YPDHSQ     | --E | ---   | TVTATRN | GN         | -----     |
| ScGE2_JGI251746                               | W  | ACRQQEIK  | QLVQHYFYGY  | LPDTSDEANP | --- | PLQ   | TVTAKLS | SGW        | -----     |
| CAB55348_Rumfl                                | W  | WKROSEIS  | CMYEYMYGK   | WIDGSD     | --- | ---   | ETTYSIS | GN         | -----     |
| MZ0003_CDW92038                               | W  | NDKRRDEVQ | QLFEAYMYGK  | VPDGET     | --- | ---   | ELIFTDA | KGERALGGAA | -----     |
| Consistency                                   | 70 | 489       | 65885       | 57684775   | *4  | 49447 | 00400   | 0005876747 | 530000000 |

|                                               |   |        |      |     |         |        |      |       |       |       |
|-----------------------------------------------|---|--------|------|-----|---------|--------|------|-------|-------|-------|
| ..... 160..... 170..... 180..... 190..... 200 |   |        |      |     |         |        |      |       |       |       |
| PcGE1_JGI300727                               | S | TGTLST | ITVT | DNG | -KSISFA | PTISIP | SGTP | PANGW | PLVIA | FE--G |



|                 |            |            |            |             |            |
|-----------------|------------|------------|------------|-------------|------------|
| ScGE1_XP_003026 | SGNSLSVQVS | YGG-KSITFN | NSITYPSGTA | PAEGWPVIA   | YE--F----  |
| PcGE2_JGI6482   | TTGNLTVTAG | FPG-KTITFS | SPITFPTGTA | PFGGWPLVIA  | YG--G----  |
| CuGE_AIY68500   | NTGTLAITAG | LSNSQTIKFS | PTISYPSGTP | PANGWPLIIA  | YE--G----  |
| WcGE1_JGI23632  | GTGTLTVTAG | LSSDNTISFS | EPITYPSGTA | PAAGWPLVIA  | YD--V----  |
| AaGE1_JGI107826 | --NLSITVS  | DQG-RSISFS | VSISGGSG-- | --SKSPAIIA  | YG--A----  |
| Cip2_AAP57749   | --NLTINCG  | EAG-KSISFT | VTITYPSSGT | --APYPAIIG  | YG--G----  |
| JGI40592_Oidma  | --STLTINCG | DSG-KSMSFT | AAITYPSSGT | --APYPAIIA  | FD--G----  |
| LfGE3_JGI349146 | --NALKITVS | EGS-KSMSFS | VNIKLPSSGA | --APYPAIIA  | YG--S----  |
| CCA74892_Serin  | --NLTINVS  | EAG-KSISFS | ISISYPSST  | --APYPAIIA  | YG--A----  |
| XP_01114526_Da  | --NKLTINVS | NGG-TSISFA | VTITAPSGGR | --SPYPAIIG  | YG--G----  |
| PaGE1_XP_001903 | --STLSISVS | EGG-KSISFT | VSINNRPSGA | --GPHPAIIN  | FGTFFG---- |
| EGX47404_Artol  | --NLTINVS  | DQG-KSISFS | VTVTAPSGGR | --APYPAIIG  | YD--G----  |
| KDQ19074_Botbo  | NTGTLTVTAG | -DNGKSVNWA | NSISYPTGTA | PAGGWPLIIA  | YG--G----  |
| KDQ11090_Botbo  | NSGSLTVTAG | -QNGKSVNWA | NSISYPSGTP | PAGGWPLIIA  | LG--G----  |
| PcGCE_JGI247750 | LTGNLTVTAG | -FPGNTTTF  | SPVTFPNGTV | PTEGWPLIIA  | YS--G----  |
| JGI392659_Cerun | TTANLTVTAG | LSADNEITFT | PTISYPSGNA | PKGGWPLIIG  | YG--G----  |
| ANB15160_Sugli  | ---TLIITAE | -VNGRSITYN | ATIVYPSAG- | --RAPYPAMIA | YS--G----  |
| XP_007585921_Ne | ---TLTITAS | -EGGKSISFS | VSISYPSST  | --TAPYPAIIA | YG--Y----  |
| NcGE_NCU09445   | ---TLTVRIT | -VGSQTVSFS | ASIKKPSST  | --SGPFPAIIG | IG--G----  |
| JGI7888_Podan   | ---NIQVRVT | -VGSKSITFS | AGIRKPSST  | --SGPFPAIIG | YG--G----  |
| XP_003844265_Le | ---SLSITST | -EGGKSVSFS | VSIKKPSST  | --AGPFPAIIA | YG--A----  |
| XP_018385058_Al | ---SLSITST | -EGGKSVTFS | VSIKKPSST  | --TGFPFAIIA | YG--A----  |
| SNOG_09306_Parn | ---SLAITST | -EGGKSVSFS | VTIKKPSST  | --AGPFPAIIA | YG--A----  |
| Rhyrul_111612   | ---SISVSVS | -DGGKSISFT | ASVRAPSGG- | --SAPYPAVIA | FG--G----  |
| XP_008084971_G1 | ---ILTVTVT | -NNKKSIAFN | ATITYPEKG- | --KAPYPAIIT | LG--Y----  |
| XP_008087696_G1 | ---SISVKVT | -NAGKSISFS | ATVKMPST   | --TGAAPAIIA | YG--G----  |
| Rhyrul_116370   | ---SLKITVE | -DNGKSTST  | VSIKYPSST  | --SGPFPAIIG | YG--G----  |
| XP_018132613_Ps | ---TLTINVS | -EGGKSISFT | ASITYPSST  | --TAPYPAIIA | IG--G----  |
| JGI99197_Aspfu  | ---HQCR--- | ---KHHLLH  | SNHLLPLL-  | --RRYPAMIA  | YG--G----  |
| Pc13g07350_Penr | ---KLSITAS | -NAGKTISFT | ATITYPSST  | --AGPYPAMIA | YG--G----  |
| LfGE2_JGI311197 | ---TSLISST | -EGGKTVSFT | VSIKTST--G | --NGPFPAIIA | YG--A----  |
| StGE2_JGI230838 | ---SITVRVT | -VGSKSISFS | ASIRKPS--G | --AGPFPAIIG | IG--G----  |
| MGG_03128_Magor | ---GLNIQIK | -VGSNTRAI  | VGITKPTNPG | --TSGGPAIIG | IG--G----  |
| AOA090CBG6_Poda | ---TLQITVT | GPQNKRGFS  | ATIQLPSGAS | SSRPAPVVIN  | IGGMQ----  |
| MYCTH_96309_Myc | ---TLNIVVT | A-GGKQGSFR | ATISLPSGAS | ASNAPVVIN   | IGGMQ----  |
| CBX90574_Lepma  | ---TLTITIA | A-GGKTASIA | ATLTLPSGS- | --GFPVVIS   | IGGMD----  |
| OBZ79634_Grifer | ---TLNISVS | V-GNRTGTFN | ATLTFPNGTT | RFRPVVVMIN  | TGGVN----  |
| LfGE1_JGI384728 | ---KLDVIA  | T-GGKTATIS | ATVNLPSST  | --TGFPVIVIA | IGGID----  |
| KDQ18272_Botbo  | ---TSLISVS | A-GGKTGTFS | ATLTLPTTG- | --QAPYVVIT  | PGSVD----  |
| ScGE2_JGI251746 | QGGTLAITIA | SGS-KSASFN | ATLTLPSGAS | ADAPVPAIIT  | LGGFG----  |
| CAB55348_Rumfl  | -SMTINVKRR | STG-KTASFK | AVINLPKNVR | HEGGAPVILG  | MHKGI----  |
| MZ0003_CDW92038 | IRKQVKISFG | EKE-DAPAMD | LLIYLPADA- | --KVRVPVFLG | LNFGHNHTIH |
| Consistency     | 0016859555 | 1262775786 | 5695495541 | 03565*6896  | 5700500000 |

|                 | ..... 210 ..... | ..... 220 ..... | ..... 230 ..... | ..... 240 ..... | ..... 250  |
|-----------------|-----------------|-----------------|-----------------|-----------------|------------|
| PcGE1_JGI300727 | -----           | -----           | -----           | GS              | IPIPAGIAKL |
| ScGE1_XP_003026 | -----           | -----           | -----           | PS              | LPIPSNVATL |
| PcGE2_JGI6482   | -----           | -----           | -----           | VS              | IPIPDGIAVL |
| CuGE_AIY68500   | -----           | -----           | -----           | GS              | IPIPAGVATL |
| WcGE1_JGI23632  | -----           | -----           | -----           | LS              | IPVPDGIAMV |
| AaGE1_JGI107826 | -----           | -----           | -----           | PS              | IPVPNGVATI |
| Cip2_AAP57749   | -----           | -----           | -----           | GS              | LPAPAGVAMI |
| JGI40592_Oidma  | -----           | -----           | -----           | GS              | LPAPASVAMI |
| LfGE3_JGI349146 | -----           | -----           | -----           | AS              | LPIPNVTATI |
| CCA74892_Serin  | -----           | -----           | -----           | MS              | IPTPAGVAVI |
| XP_01114526_Da  | -----           | -----           | -----           | GS              | IPVPAGVALI |
| PaGE1_XP_001903 | -----           | -----           | -----           | AS              | LPVPAGVATI |
| EGX47404_Artol  | -----           | -----           | -----           | GS              | IPIPAGVAKI |
| KDQ19074_Botbo  | -----           | -----           | -----           | GS              | IPVPAGIATL |
| KDQ11090_Botbo  | -----           | -----           | -----           | GS              | IPVPAGIATL |
| PcGCE_JGI247750 | -----           | -----           | -----           | LS              | IPIPDGIAVL |
| JGI392659_Cerun | -----           | -----           | -----           | PS              | IPIPDGVAVM |
| ANB15160_Sugli  | -----           | -----           | -----           | IS              | IPQPDNIAFI |
| XP_007585921_Ne | -----           | -----           | -----           | PS              | IPIPAGVATI |
| NcGE_NCU09445   | -----           | -----           | -----           | IS              | IPIPSTVATI |
| JGI7888_Podan   | -----           | -----           | -----           | AS              | IPIPSNVATI |
| XP_003844265_Le | -----           | -----           | -----           | AS              | IPVPANVATI |
| XP_018385058_Al | -----           | -----           | -----           | AS              | LPVPSNVATI |
| SNOG_09306_Parn | -----           | -----           | -----           | AS              | IPVPATVATI |
| Rhyrul_111612   | -----           | -----           | -----           | SS              | LPIPAGVATI |
| XP_008084971_G1 | -----           | -----           | -----           | PN              | IPKLDGVAFI |
| XP_008087696_G1 | -----           | -----           | -----           | AS              | LPIPAGVATI |
| Rhyrul_116370   | -----           | -----           | -----           | GS              | IPIPAGVASI |
| XP_018132613_Ps | -----           | -----           | -----           | LS              | IPTPAGVAVI |
| JGI99197_Aspfu  | -----           | -----           | -----           | LS              | IPLPPGVAAI |

|                 |            |            |            |            |            |            |
|-----------------|------------|------------|------------|------------|------------|------------|
| Pc13g07350_Penr | -----      | -----      | -----      | -----      | LS         | IPLPPGVATI |
| LfGE2_JGI311197 | -----      | -----      | -----      | -----      | AS         | IPVPAGVATI |
| StGE2_JGI230838 | -----      | -----      | -----      | -----      | AS         | IPIPSNVATI |
| MGG_03128_Magor | -----      | -----      | -----      | -----      | IS         | IPVPAGIGRI |
| AOA090CBG6_Poda | -----      | -----      | -----      | -----      | NQ         | PYLQAGIAVA |
| MYCTH_96309_Myc | -----      | -----      | -----      | -----      | NQ         | PYLSAGIAVA |
| CBX90574_Lepma  | -----      | -----      | -----      | -----      | VK         | SYTNAGIAVA |
| OBZ79634_Grifr  | -----      | -----      | -----      | -----      | ET         | VFLGSGVALA |
| LfGE1_JGI384728 | -----      | -----      | -----      | -----      | NN         | SYLKAGIAVV |
| KDQ18272_Botbo  | -----      | -----      | -----      | -----      | NN         | AFLSQGVALV |
| ScGE2_JGI251746 | -----      | -----      | -----      | -----      | -          | PSATGAAAV  |
| CAB55348_Rumfl  | -----      | -----      | -----      | -----      | SES        | TATSNGYAVI |
| MZ0003_CDW92038 | KDKEIWLTES | WVRTNKKFGI | TKNKANELSR | GVAAGRWOIE | KAI        | AKGYGVA    |
| Consistency     | 0000000000 | 0000000000 | 0000000000 | 0000000037 | 6767578957 |            |

|                 |             |            |            |            |            |            |          |
|-----------------|-------------|------------|------------|------------|------------|------------|----------|
|                 | .....       | 260.....   | 270.....   | 280.....   | 290.....   | 300        |          |
| PcGE1_JGI300727 | TYSNSDMAQQ  | TDTSS      | -----      | -----      | RGKGLFYNLY | GSG        | ---ATA   |
| ScGE1_XP_003026 | SFQNSAMGKQ  | DSTSS      | -----      | -----      | RGQGLFYDLY | GSS        | ---SNA   |
| PcGE2_JGI6482   | TYDNSAMAEQ  | NDQSS      | -----      | -----      | RGVGLFFDVY | GAN        | ---ATA   |
| CuGE_AIY68500   | TYSNSDMAQQ  | NSASS      | -----      | -----      | RGQGLFYQLY | GST        | ---HSA   |
| WcGE1_JGI23632  | VYNNDDIAQE  | NDLSS      | -----      | -----      | RGVGLFYDLY | GTD        | ---ATA   |
| AaGE1_JGI107826 | RFNNDIAAQ   | QSGSS      | -----      | -----      | RGQKGFYDLY | GSG        | ---HSA   |
| Cip2_AAP57749   | NFNNDNIAAQ  | VNTGS      | -----      | -----      | RGQKGFYDLY | GSS        | ---HSA   |
| JGI40592_Oidma  | NFNCDDMAAQ  | VSTSS      | -----      | -----      | RGQKGFYDLY | GSG        | ---ASA   |
| LfGE3_JGI349146 | TYQNFEMAAD  | NG         | -----      | -----      | RGKGFYEFY  | GSN        | ---HNA   |
| CCA74892_Serin  | TFNNDIAAQ   | QNSGS      | -----      | -----      | RGSKGFYDLY | GSN        | ---HSA   |
| XP_01114526_Da  | NFNNDIAAQ   | TNTGS      | -----      | -----      | RGQKGFYDLY | GSG        | ---HSA   |
| PaGE1_XP_001903 | NFNNDIAAQ   | QGGSS      | -----      | -----      | RGRKGFYDLY | GSS        | ---HSA   |
| EGX47404_Artol  | SFSIADIAAQ  | TNTGS      | -----      | -----      | RGQKGFYDLY | GSG        | ---HSA   |
| KDQ19074_Botbo  | NYNNDNIAQQ  | NSGSS      | -----      | -----      | RGVGLFYDLY | GSS        | ---ATA   |
| KDQ11090_Botbo  | NYNNDNIAQQ  | SSTSS      | -----      | -----      | RGTGLFYDLY | GNT        | ---ATA   |
| PcGCE_JGI247750 | TYDNSAIGEQ  | NDQTS      | -----      | -----      | RGVGFYDLY  | GHN        | ---ATA   |
| JGI392659_Cerun | FYDNSGMAQQ  | NDLSS      | -----      | -----      | RGVGLFYDLY | GRN        | ---ASS   |
| ANB15160_Sugli  | VFDNSNFAQQ  | NAMYSASGIA | YGGGDAFTTT | RGQGFYDLY  | GAA        | ---HPS     |          |
| XP_007585921_Ne | TFNNDIAAQ   | TNTGS      | -----      | -----      | RGQKGFYDLY | GSG        | ---HGA   |
| NcGE_NCU09445   | TFPNDFAQQ   | SGTSS      | -----      | -----      | RGRKGFYDLY | GSS        | ---HSA   |
| JGI7888_Podan   | TFGNDAFQAQ  | SGMGS      | -----      | -----      | RGRGFYDLY  | GSS        | ---HSA   |
| XP_003844265_Le | TFNNDIEGQQ  | QGGNS      | -----      | -----      | RGKGFYDLY  | GSS        | ---HSA   |
| XP_018385058_Al | TFNNDIEGQQ  | QGGSS      | -----      | -----      | RGKGFYDLY  | GSS        | ---HSA   |
| SNOG_09306_Parn | TFNNDIEGQQ  | SGGSS      | -----      | -----      | RGKGFYDLY  | GSS        | ---HSA   |
| Rhyru1_111612   | TFNNDQMGAAQ | SGGSS      | -----      | -----      | RGKGFYDLY  | GSG        | ---HSA   |
| XP_008084971_Gl | NFPNDQIAGQ  | IGASY      | -----      | -----      | RGQGLFYELY | GKN        | ---ASA   |
| XP_008087696_Gl | TFNNDGVAQQ  | TNSGS      | -----      | -----      | RGKGLFYDLY | GSG        | ---HSA   |
| Rhyru1_116370   | SYSNFDIGAD  | NG         | -----      | -----      | RGKGFYDIY  | GKD        | ---HSA   |
| XP_018132613_Ps | NFGNDDIAAQ  | NSGSS      | -----      | -----      | RGQKGFYDIY | GAG        | ---HSA   |
| JGI99197_Aspfu  | TFDNSQIAQQ  | NDQSS      | -----      | -----      | RGQGLFYDLY | GAN        | ---HSA   |
| Pc13g07350_Penr | TFDNSQIAQQ  | NDQSS      | -----      | -----      | RGKGLFYDLY | GAD        | ---HPA   |
| LfGE2_JGI311197 | TFNNDNIGAQ  | QGGSS      | -----      | -----      | RGQKGFYDLY | GSG        | ---HSA   |
| StGE2_JGI230838 | TFNNDNIGAQ  | MGSGS      | -----      | -----      | RGQKGFYDLY | GRD        | ---HSA   |
| MGG_03128_Magor | NFGNDACASQ  | AGSQS      | -----      | -----      | HGTGWFFDLH | GRS        | ---HSA   |
| AOA090CBG6_Poda | QFDYTTVAPD  | SNSK       | -----      | -----      | --TGVFWSIY | N-G        | ---RDI   |
| MYCTH_96309_Myc | QFDYTTVSPD  | SNAK       | -----      | -----      | --TGAFWSIY | N-G        | ---RDI   |
| CBX90574_Lepma  | AFDYTKVAAD  | SNSK       | -----      | -----      | --SGSFWTLY | N-G        | ---KDI   |
| OBZ79634_Grifr  | TFDVSVAAD   | STTP       | -----      | -----      | --GGAFWDLY | S-G        | ---EDI   |
| LfGE1_JGI384728 | TFDYGKVAAD  | SNSK       | -----      | -----      | --TGSFWTLY | N-G        | ---KDI   |
| KDQ18272_Botbo  | SFSVTVAAD   | SASK       | -----      | -----      | --TGAFWSVY | N-G        | ---RNI   |
| ScGE2_JGI251746 | SFDAASVAYD  | GP         | -----      | -----      | LKTGAFWDLY | E          | ---GDI   |
| CAB55348_Rumfl  | TYDSGDMFSA  | PGTAQ      | -----      | DNN        | QHKGAFYDLY | PYGRNWDEQT |          |
| MZ0003_CDW92038 | TIYCGDIDPD  | FNFPS      | -----      | N          | GIQAYYKKD  | QTIP       | ---EKGQW |
| Consistency     | 6856547757  | 4544500000 | 0000000000 | 6659497688 | 7450000567 |            |          |

|                 |            |            |             |                 |             |       |            |     |
|-----------------|------------|------------|-------------|-----------------|-------------|-------|------------|-----|
|                 | .....      | 310.....   | 320.....    | CE15 consensus: | G-C-S-R-x-G | ..... | 340.....   | 350 |
| PcGE1_JGI300727 | SAMTAWAWGV | SRIIDALEKT | P--SAQINTQ  | RIAVT           | GCSR        | D     | GKGALMAGAL |     |
| ScGE1_XP_003026 | SAMTAWAWGV | SRIIDAIEST | P--DAKLNPA  | AVGVT           | GCSR        | N     | GKGALMAGAL |     |
| PcGE2_JGI6482   | SSMTAVVWGL | SRIIDSLEVT | P--AAHINTA  | KIAVT           | GCSR        | N     | GKGALMAGAF |     |
| CuGE_AIY68500   | SAMTAVVWGV | SRIIDALEMT | P--TAQINTQ  | RIGVT           | GCSR        | D     | GKGALMAGAF |     |
| WcGE1_JGI23632  | SAMTAVVWGV | SRIIDALETT | P--AANINTA  | KIAVT           | GCSR        | D     | GKGALMAGAF |     |
| AaGE1_JGI107826 | GAMTAWAWGV | ARIIDALEKT | P--AAGIDPT  | RVGVT           | GCSR        | N     | GKGAMVAGAL |     |
| Cip2_AAP57749   | GAMTAWAWGV | SRVIDALELV | P--GARIDTT  | KIGVT           | GCSR        | N     | GKGAMVAGAF |     |
| JGI40592_Oidma  | GAMTAWAWGV | SRVIDALEIT | S--SAKIDTT  | RIGVT           | GCSR        | N     | GKGAMVAGAF |     |
| LfGE3_JGI349146 | GGMIAAAWGV | DRIIDALEMT | P--AAKIDPK  | RVGVT           | GCSR        | N     | GKGSMIAGAF |     |
| CCA74892_Serin  | GALIAWAWGV | SRIIDAIETT | T--NVRINPA  | KIGVT           | GCSR        | N     | GKGAIVAGAF |     |
| XP_01114526_Da  | GALTAWAWGV | SRIIDALEIT | P--AAGVNPA  | RVGVT           | GCSR        | N     | GKGAIVAGAL |     |
| PaGE1_XP_001903 | GALTAWAWGV | SRVIDALELT | Q--AQTGIDPT | RLGVT           | GCSR        | N     | GKGAIVAGAL |     |
| EGX47404_Artol  | GALTAWAWGV | SRIIDAIETT | P--ATNINP   | KIGVT           | GCSR        | N     | GKGAIVAGAL |     |

|                 |            |            |            | CE15 consensus: | G-C-S-R-x-G  |  |
|-----------------|------------|------------|------------|-----------------|--------------|--|
| KDQ19074_Botbo  | SAMTAWTWGV | SRIIDALET  | P--AAGIDLS | KIAITGCSR       | GKGMALMAGAF  |  |
| KDQ11090_Botbo  | SAMSAWTWGV | SRIIDALET  | P--AASINTE | RIAVTGCSR       | GKGMALMIGAF  |  |
| PcGE1_JGI247750 | SAMSAVWVGV | SRIIDVLEVT | P--AAHVNTA | KIAVTGCSR       | GKGMALMAGAF  |  |
| JGI392659_Cerun | SSMTAVWVGV | SRIIDVLEVT | P--AAQINVK | KIGVTGCSR       | GKGMALMAGAF  |  |
| ANB15160_Sugli  | SAMMAWAWGA | SRIVDVLEQL | P--QAKINPK | RIGITGCSR       | GKGMALVAGAY  |  |
| XP_007585921_Ne | GAMTAWAWGV | SRIIDAVAST | A-D-ARIDAA | RIGVTGCSR       | GKGMALVAGAL  |  |
| NcGE1_NCU09445  | GALIAWAWGV | DRLVDALQV  | Q-STSGIDPK | RLGVTGCSR       | GKGMALVAGAL  |  |
| JGI7888_Podan   | GSLTAWAWGI | DRLIDALEKT | P-A-AGIDTT | RLGVTGCSR       | GKGMALVAGAF  |  |
| XP_003844265_Le | GALTAWAWGV | DRIIDALEIT | P--AAGIDPK | FVGVTGCSR       | GKGMALVAAAL  |  |
| XP_018385058_Al | GALTAWAWGV | DRIMDALEAT | P--GAGIDPK | RVGVTGCSR       | GKGMALVAAAL  |  |
| SNOG_09306_Parn | GATTAWAWGV | DRIMDALELT | A-SSTGIDPK | RVGVTGCSR       | GKGMALVAAAL  |  |
| Rhyrul_111612   | GAMAAWAWGV | SRIMDVLEAD | G--GKIDPK  | RIGVTGCSR       | GKGMALVAGAF  |  |
| XP_008084971_Gl | GSLTAWAWGV | SRLIDALEET | R--GKINVE  | FIGVTGCSR       | GKGMALVAGAL  |  |
| XP_008087696_Gl | GATTAWAWGV | SRILDVIEAD | T--TKKIDVT | RIGVTGCSR       | GKGMALVAGAL  |  |
| Rhyrul_116370   | GAMIAWAWGV | GRIIDALEKT | P--EAKIDPK | RVGVTGCSR       | GKGMALVAGAF  |  |
| XP_018132613_Ps | GATTAWAWGV | SRLIDVLETO | A-TAARINVK | KLGVSGCSR       | GKGMALVAGAL  |  |
| JGI99197_Aspfu  | GALMAWAWAT | SLIIDRLEAT | P-A-ARINTS | RIGVTGCSR       | GKGMALVAGAF  |  |
| Pc13g07350_Penr | GAMMAWAWAT | SLIIDRLEAT | P-A-ARINTA | RIGVTGCSR       | GKGMALVAGAF  |  |
| LfGE2_JGI311197 | GALTAWAWGV | DRVMDALEAT | S--ATKIDPK | RVGVTGCSR       | GKGMALVAAAL  |  |
| StGE2_JGI230838 | GSLTAWAWGV | DRLIDGLEQV | GAQASGIDTK | RLGVTGCSR       | GKGMALVITGAL |  |
| MGG_03128_Magor | GATTAWAWCV | GRIIDALEQL | GPAVTGINTA | RLGVSGCSR       | GKGMALVITGAL |  |
| AOA090CBG6_Poda | GVLTAWAWGF | HRTLDAIQLT | ---VPEIDPY | RVGVTGCSRL      | GKGMALVAGLF  |  |
| MYCTH_96309_Myc | GVLTAWAWGF | HRTLDAINLT | ---VPEIDAA | RVGVTGCSRL      | GKGMALVAGLF  |  |
| CBX90574_Lepma  | GVLTAWAWGF | HRVLDGIELK | ---VPEIDAT | KSGVTGCSRL      | GKGMALVAGLF  |  |
| OBZ79634_Grifr  | GVLTAWAWGY | HRIMDAIIDK | ---VPEIDPO | RFGVTGCSRW      | GKGMALVAGIF  |  |
| LfGE1_JGI384728 | GVLTAWAWGF | HRVLDGIELK | ---VPEIDAK | KSGVTGCSRL      | GKGMALVAGLF  |  |
| KDQ18272_Botbo  | GVLTAWAWGY | HRVLDAIILR | ---VPEIDTS | RVGVTGCSRY      | GKGMALVAGLF  |  |
| ScGE2_JGI251746 | GVLAAWGWGF | SKIIDALEAA | ---VPEVDIE | RIAVSGCSRY      | GKGMALVAGFF  |  |
| CAB55348_Rumfl  | GDLMASWGI  | SRILDALYNG | AAKELNINPD | SSIVTGVSRY      | GKGMALVAGAF  |  |
| MZ0003_CDW92038 | GTIAAWAFGL | SCAMDYFETD | ---TDIDHK  | KVAVLGHSRL      | GKGMALVAGAI  |  |
| Consistency     | 7777*98997 | 6888*78846 | 3003549755 | 77799*9*6       | **89668987   |  |

|                 | catalytic res: E |            |            |            |            |  |
|-----------------|------------------|------------|------------|------------|------------|--|
|                 | 360              | 370        | 380        | 390        | 400        |  |
| PcGE1_JGI300727 | EPRIALTIPQ       | ESGSGGDTCW | RLSKAESDQG | HQVQTATEI  | -----      |  |
| ScGE1_XP_003026 | EPVALTLPQ        | ESGSGGDACW | RLSRYEEQQG | SQVQTATEI  | -----      |  |
| PcGE2_JGI6482   | EERIALTIPO       | ESGSGGDTCW | RLSKFEQDSG | DVVQQATEI  | -----      |  |
| CuGE1_AY68500   | EERIALTIPO       | ESGSGGDACW | RLSKYEIDNG | NQVQDAVEI  | -----      |  |
| WcGE1_JGI23632  | EPRIALTIPQ       | ESGSGGDTCW | RLSKYEQDSG | DVVQQATEI  | -----      |  |
| AaGE1_JGI107826 | EPRIALTIPQ       | ESGSGGSACW | RISNWQGGQG | QNVQTPAQI  | -----      |  |
| Cip2_AAP57749   | EKRIVLTLPQ       | ESGAGGSACW | RISDYLKKSQ | ANIQTASEI  | -----      |  |
| JGI40592_Oidma  | DNRIVLTLPQ       | ESGAGGSACW | RISDYLKKSQ | ANIQTAGEI  | -----      |  |
| LfGE3_JGI349146 | VDRIALALPQ       | EGGQSAAGCW | RIADEIQKNG | TKVETAHQI  | -----      |  |
| CCA74892_Serin  | DTRVALTIPO       | ESGSGGSACW | RLSDAQKSSG | QNVQTASQI  | -----      |  |
| XP_01114526_Da  | DDRIALTIPQ       | ESGSGGSACW | RLSDYQKSQG | QNVQTASQI  | -----      |  |
| PaGE1_XP_001903 | EPRIALTLPQ       | ESGAGGSGCW | RIATWQKNNG | QNVQDSTQI  | -----      |  |
| EGX47404_Artol  | DDRIALTLPQ       | ESGSGGSACW | RLSDYQKSQG | QNVQTASQI  | -----      |  |
| KDQ19074_Botbo  | ETRIALTIPQ       | ESGSGGDACW | RLSKFEESSG | SKVQTATEI  | -----      |  |
| KDQ11090_Botbo  | ETRIALTIPQ       | ESGSGGDACW | RLSKFEESSG | SKVQTATQI  | -----      |  |
| PcGE1_JGI247750 | EERIALTIPO       | ESGSGGDTCW | RLSKFEQDSG | DVVQQATEI  | -----      |  |
| JGI392659_Cerun | EERIALTIPO       | ESGSGGDTCW | RLSKFEQDNG | SVVQEAVEI  | -----      |  |
| ANB15160_Sugli  | DDRFVLTIPQ       | ESGSGGAACW | RLSQYNLTHN | DVVQTATEI  | -----      |  |
| XP_007585921_Ne | DDRVALTIPO       | ESGAGGAACW | RISDQQAAG  | KNVQTASQI  | -----      |  |
| NcGE1_NCU09445  | VDRIALTIPQ       | ESGAGGAACW | RISDSEKSAG | KNIQTASQI  | -----      |  |
| JGI7888_Podan   | VKRIALTIPQ       | ESGAGGAACW | RISDQQKSSG | ANIQTASQI  | -----      |  |
| XP_003844265_Le | VKRIALGLPQ       | ESGAGGAACW | RISDSEKAKG | KNIQTSSQI  | -----      |  |
| XP_018385058_Al | VDRIALGLPQ       | ESGSGGAACW | RISDSEKAKG | KNIQTSSQI  | -----      |  |
| SNOG_09306_Parn | VDRIALGLPQ       | ESGSGGAACW | RISDSEKAKG | KNIQTSSQI  | -----      |  |
| Rhyrul_111612   | EPRIALTLPQ       | ESGSGGAACW | RISDSQKSAG | KNIQTASQI  | -----      |  |
| XP_008084971_Gl | DDRIGLTIPO       | ESGTGGSGCW | RVADATKAAG | TNIQTAAQI  | -----      |  |
| XP_008087696_Gl | DDRIALTLPQ       | ESGSGGAACW | RISDLEEAAG | KKIQTAEHI  | -----      |  |
| Rhyrul_116370   | EERVALSIPQ       | EGGQGSAGCW | RIADEIQKNG | TKVETAHQI  | -----      |  |
| XP_018132613_Ps | EPRIALTIPQ       | ESGSGGAACW | RISDSVFAAG | GNIQTAEHI  | -----      |  |
| JGI99197_Aspfu  | DSRIALTVPQ       | ESGTGGSGCW | RLAAASEGAP | QNVQTAGEI  | -----      |  |
| Pc13g07350_Penr | DSRIALTVPQ       | ESGTGGSGCW | RLAAASEGAP | QDVQTAGEI  | -----      |  |
| LfGE2_JGI311197 | VGRIALGLPQ       | ESGSGGAACW | RVSDSEKAKG | KNIQTASQI  | -----      |  |
| StGE2_JGI230838 | VDRIALTIPQ       | ESGAGGAACW | RISDQQAAG  | ANIQTAAQI  | -----      |  |
| MGG_03128_Magor | EKRIALTIPQ       | ESGSGGAACW | RISDSEKAKG | KNIQTASQI  | -----      |  |
| AOA090CBG6_Poda | DKRITVTMPM       | SSGVQGLGYP | RYFTLSC-QG | ENLENSKQG  | -----      |  |
| MYCTH_96309_Myc | DKRITLTMPM       | SSGVQGAGPY | RYYDMSG-QG | ENLENSKQG  | -----      |  |
| CBX90574_Lepma  | DKRIAVTMPM       | CSGVQGAGPY | RYSLSGQ--G | ENLENAKSG  | -----      |  |
| OBZ79634_Grifr  | DERVALSIPM       | SSGLEIGIPW | RFFFEEDGAN | EMIQNIFGY  | -----      |  |
| LfGE1_JGI384728 | DARIAVTMPM       | CSGVQGAGPY | RYSLSGQGEN | LENSKSGA-- | -----      |  |
| KDQ18272_Botbo  | DERITLTLAM       | SPGLGAGVPW | RFFYESGGAN | EKIENIWGY  | -----      |  |
| ScGE2_JGI251746 | DERVTLTVPM       | SSGLMGMAPF | RFQYEENGAN | EQLSDMD--  | -----      |  |
| CAB55348_Rumfl  | DTRIKMCAPS       | CSGAGGLALY | RYSSVGKTYD | FSSKGGSSSY | TYKENEPLGS |  |



MZ0003\_CDW92038 DTRFALTISN CSGCGGAALS RRRFGE---- -TVRRINTS- - - - -  
 Consistency 64\*9797898 79\*6795668 \*674455447 4588674660 0000000000

..... 410..... 420..... 430..... 440..... 450

PcGE1\_JGI300727 ---VTENVWF STNFNNYVNN LNVLPYDHHM LMALVA--PR -ALVSFENTD  
 ScGE1\_XP\_003026 ---VGENCWF SAGFDQYVNN LDSLPYDHHL LAALVA--PR -GLISYANTD  
 PcGE2\_JGI6482 ---VQENVWF STNFNNYVFN ISLLPYDHEE LAALVA--PR -PLISYENTD  
 CuGE\_AIY68500 ---VGENVWF STNFNNYVQK LPTVPEdHHL LAAMVA--PR -AMISFENTD  
 WcGE1\_JGI23632 ---VTENVWF STNFNNYVNN LSVLPYDHEE LAAMVA--PR -PLLSYENTE  
 AaGE1\_JGI107826 ---ITENVWL GPVFNNHANN VNALPFDHHQ LAGLIA--PR -ALYVIENS  
 Cip2\_AAP57749 ---IGEDPWF STTFNSYVNO VPVLPFDHHS LAALIA--PR -GLFVIDNNI  
 JGI40592\_Oidma ---IGEDPWF SSNFNNYVNO VPILPFDHHS LAALIA--PR -GLFVIDNNI  
 LfGE3\_JGI349146 ---VNGDSWF STDFSKYVDT VPTLPWDNHM LHALYAYPPR -GLLIIENTA  
 CCA74892\_Serin ---ITENVWF SKSFDPFVTS VTRLPFdHHL LAGMVA--PR -GLLVIENTS  
 XP\_01114526\_Da ---ITENVWF STNFNANVNO VNRLPFDHHS LAGLVA--PR -GLYVIENTS  
 PaGE1\_XP\_001903 ---VQENVWF SPNFNSYVNN VNQLPFDHHL LAGLIA--PR -ALYVMENV  
 EGX47404\_Artol ---ITENVWF STAFNANVNO VNRLPFDHHS LAALVA--PR -GLYVIENTS  
 KDQ19074\_Botbo ---VGENVWF STNFNNYVNT LGKLPFDHHS LMAMVA--PR -GLISFENTD  
 KDQ11090\_Botbo ---VTENVWF SSGFNSYVNO LSKLPYDHHS LVALVA--PR -GLVSFENTD  
 PcGCE\_JGI247750 ---VQENVWF STNFNDFVFN ISVLPYDHHS LAGLIA--PR -PMISYENTD  
 JGI392659\_Cerun ---VQEDVWF STNFENFVHN ISVLPYDHHF LAGMVA--PR -PMISFENTD  
 ANB15160\_Sugli ---VQENVWF STSFERIYANY TDQLPLDHHI LAGLVA--PR -GLAIFENIG  
 XP\_007585921\_Ne ---VTENVWF SKAFEQYTSR VPSPLEDHHE LAALVA--PR -GLLVIENTD  
 NcGE\_NCU09445 ---VTENVWF SPAFNAYTRQ TTNIPADHHM LAALTV--PR -GLIAFEND  
 JGI7888\_Podan ---IGEOPWF SKNFDAHVRS ITNIPQDHHF LAAMIV--PR -GLAVFENN  
 XP\_003844265\_Le ---VGENVWF STRFNASTK ANSTSTdHHQ LAGMVA--PR -GLLVIENTE  
 XP\_018385058\_Al ---VGENVWF STRFNASTK SNTLATDHHQ LAGMVA--PR -GLLVIENTE  
 SNOG\_09306\_Parn ---VTENVWF STRFNASTK ANTLATDHHQ LAGMVA--PR -GLLVIENTE  
 Rhyrul\_111612 ---VGENVWF SPNFNSFSTK TNLATDdHE LAALVA--PR -GLFVIEND  
 XP\_008084971\_Gl ---ITENTWL SQRFDPWTTK VSSLPIDHHL LAGLVA--PR -GLLVIND  
 XP\_008087696\_Gl ---IGENVWF SKRFDPFATK TSTLAVDHHM LPALIA--PR -GLLVIENT  
 Rhyrul\_116370 ---VNGDTWY STTFPKYVDT VPTIPDNHL LHALYAYPAR -GLLIIENTA  
 XP\_018132613\_Ps ---VGENVWF SPNFNAYVNT IPTMPFDHHM LAGLVA--PR -GLFVIENNI  
 JGI99197\_Aspfu ---VQENVWF STAFNAYAND EDRLPFDHHM LAGLIA--PR -GLLSIDNAG  
 Pc13g07350\_Penr ---VQENVWF SAAFNTYAND VDRPPFDHHM LAGLIA--PR -GLVSIDNAG  
 LfGE2\_JGI311197 ---VGENVWF SKNFNASTK ANTLATDHHQ LAGMVA--PR -GLLVIENTE  
 StGE2\_JGI230838 ---ITENPWF SRNFDPHVNS ITSVPQDHHL LAALIV--PR -GLAVFENN  
 MGG\_03128\_Magor ---VTENAWF SPRFNSFTSR TTTIPADHHF LAAMVA--PR -GLFVIEND  
 AOA090CBG6\_Poda ---A--GWWS NSKLGFSFMNH HENLPFDAHT IAAIA--PR -ALIIDOGTG  
 MYCTH\_96309\_Myc ---A--GWWT NSKLGTFVNH AQNLFPDAHT IVAAIA--PR -AVIIDOGTG  
 CBX90574\_Lepma ---A--GWWT SSGISQFVGK STQLPDAHT IVAAIA--PR -AVILSQNSG  
 OBZ79634\_Grifr ---A--PYWS TSRLGQFVFN VTNLPDAHL HAALVA--PR -AIVWDEGEI  
 LfGE1\_JGI384728 ---A--GWWT SSGISQFVGK STQLPDAHT IVAAIA--PR -AVILEOGAS  
 KDQ18272\_Botbo ---A--PWWV STRIGEFVND ARKLPDAHS IAAVIA--PR -ALIWDVGT  
 ScGE2\_JGI251746 ---DTSSSWP DDTLVSFRND PARLPVDSNF ITAGVAPR-- -ALIWDGTT  
 CAB55348\_Rumfl LQASGEQGW F NGRFMEFR-N AEQFPMDQHM LGALCCDPDR YLFIIGSCS  
 MZ0003\_CDW92038 ---FPHWF CSRFHQYNDK EDKLPIDQHM LIALCA--PR -PVLINSATE  
 Consistency 00073664\*7 8548546655 544884\*694 8777890089 0686547752

..... 460..... 470..... 480..... 490..... 500 catalytic res: H

PcGE1\_JGI300727 YTWLSPMSAW G-CVNAAHV FSALGV---- -ADHH GFAQVGGHSH  
 ScGE1\_XP\_003026 YVWLSGMSSF G-CMTAAHAV YEALGV---- -PENH GFEQVGGHSH  
 PcGE2\_JGI6482 FEWLSPLSGF G-CMTAAHTV WEAMGI---- -PDKH GFVQVGNHSH  
 CuGE\_AIY68500 YLWLSPMSSF G-CMTAAHTV WQGLGI---- -ADSH GFAQVGGHSH  
 WcGE1\_JGI23632 YEWLSPLSAY G-CMSAAHTV YEALGI---- -PDYH GFSQVGNHSH  
 AaGE1\_JGI107826 MEWLGWATY G-CMAAARTQ WEALGA---- -LDNF GFSQVGNHSH  
 Cip2\_AAP57749 D-WLGPQSCF G-CMTAAHMA WQALGV---- -SDHM GYSQIGAHSH  
 JGI40592\_Oidma D-WLGPQSCF G-CMTTARMA YQALGV---- -TNNM GYSQIGAHSH  
 LfGE3\_JGI349146 IDYLGPTSNY H-CATAGRKV HEALGV---- -KDYF GFSQNSHSDH  
 CCA74892\_Serin MEWLGNMSCF G-CMKAGQTI YQALGV---- -QSNM GFSQVGNHSH  
 XP\_01114526\_Da MEWLGALSTY G-CMKVGLI YQALGV---- -SSNM GYSQVGNHSH  
 PaGE1\_XP\_001903 MEWLGKISTY G-CMGIARKQ WEALGA---- -LDNF GFSQVGNHSH  
 EGX47404\_Artol MEWLGALSTY G-CMKAGSLV YQALGV---- -SSNM GYSQVGHGDH  
 KDQ19074\_Botbo FVWLSPMSSW G-CASAAHTV YKALGV---- -PQNH GFAQIGGHSH  
 KDQ11090\_Botbo FIWLSPMNSW G-CVSAGRTV YRALGV---- -PQNH GFAQVGGHSH  
 PcGCE\_JGI247750 FEWLSPLSGF G-CMTAAHPV WEAMGV---- -PDNH GFVQVGNHSH  
 JGI392659\_Cerun LVWLSPMSSGF G-CMTAAHNS WQALGV---- -PDNH GFVQVGGHSH  
 ANB15160\_Sugli YPWLGPPSVY G-CMVAARNI YEAVGA---- -TSNF GFSQDGPNNH  
 XP\_007585921\_Ne IDWLGPVSTT G-CMKVGRLI YKAAGA---- -PDAM GFSLVGGHSH  
 NcGE\_NCU09445 IDWLGPVSTT A-CMQAGRLI YKAYGV---- -SNHM GFSLVGGHSH  
 JGI7888\_Podan IDWLGPVSTT G-CMRAGRQI YKAYGV---- -PNNM GFSLIGGHSH  
 XP\_003844265\_Le IDWLGPVSTT A-CMKAGRLI YKALGV---- -PDNM GLTGSGNHSH  
 XP\_018385058\_Al IDWLGPVSTT A-CMKAGRLI YKALGV---- -PDNM GFTGSNNHSH  
 SNOG\_09306\_Parn IDWLGPGSTT A-CMKAGRLI YKAYGV---- -PANM GFTGSNNHSH  
 Rhyrul\_111612 IDWLGPVSTT G-CMKVGRLI YKAVGA---- -ADAM GFGLVGGHSH

|                 |           |      |     |   |           |        |        |        |      |        |        |         |       |         |
|-----------------|-----------|------|-----|---|-----------|--------|--------|--------|------|--------|--------|---------|-------|---------|
| XP_008084971_G1 | IDWLGPTS  | STA  | V   | - | CMGVGQLV  | YKALGE | ---    | ---    | ---  | ---    | TDAF   | GYS     | DVGAH | NH      |
| XP_008087696_G1 | IDWLGPVST | TT   | G   | - | CMRVGALA  | YQALGA | ---    | ---    | ---  | ---    | TDSF   | GFSEV   | APHNH |         |
| Rhyrul_116370   | IDYLGPPSN | NY   | M   | - | CAKAGRMV  | FQSLGI | ---    | ---    | ---  | ---    | TDYM   | GFSQNS  | SHSNH |         |
| XP_018132613_Ps | D-WLGP    | MATT | G   | - | CMKTGQMI  | YKALGV | ---    | ---    | ---  | ---    | PDNM   | GFSETT  | PHSH  |         |
| JGI99197_Aspfu  | YQWLGPCS  | SSL  | G   | - | CMGTARLV  | WQAMGV | ---    | ---    | ---  | ---    | PDRM   | GYSMST  | NHPH  |         |
| Pc13g07350_Penr | YQWLGPWSS | SL   | G   | - | CMGTARLI  | WQAMGV | ---    | ---    | ---  | ---    | PDRM   | GYSMST  | DHPH  |         |
| LfGE2_JGI311197 | IDWLGPVST | TT   | A   | - | CMKAGRLI  | YKALGV | ---    | ---    | ---  | ---    | PDNM   | GFTGSG  | NHHA  |         |
| StGE2_JGI230838 | IDWLGPVST | TT   | G   | - | CAAAGRLI  | YKAYGV | ---    | ---    | ---  | ---    | PNNM   | GFSLVGG | HNH   |         |
| MGG_03128_Magor | IDWLGPVST | TT   | A   | - | CMKAGRAI  | YQALGV | ---    | ---    | ---  | ---    | GPSM   | GFSLVGG | HQH   |         |
| AOA090CBG6_Poda | DQFVNSKGT | A    | T   | V | IFPAAKVV  | YDWLGA | ---    | ---    | ---  | ---    | GDKI   | GINVRS  | GG-H  |         |
| MYCTH_96309_Myc | DPFVNSKGT | A    | V   | V | VYPAAKVV  | YDWLGA | ---    | ---    | ---  | ---    | GENI   | GISVRGG | -H    |         |
| CBX90574_Lepma  | DQFTDSKGT | A    | Q   | I | TFFPAAKVV | YKWLGV | ---    | ---    | ---  | ---    | GEKL   | GMSIPS  | GG-H  |         |
| OBZ79634_Grifr  | DYWTNPEGE | A    | S   | V | TFFAAHAV  | YEWLGA | ---    | ---    | ---  | ---    | GDRV   | GVAIRPG | -H    |         |
| LfGE1_JGI384728 | DQFTDSKGT | A    | T   | V | TFFAAHAV  | YNWLGV | ---    | ---    | ---  | ---    | GPQL   | GMAIPKG | -H    |         |
| KDQ18272_Botbo  | DYWTNPEGE | S    | A   | V | TFFAAHAV  | YNWLGA | ---    | ---    | ---  | ---    | SGQV   | GLATRS  | GG-H  |         |
| ScGE2_JGI251746 | DYWTNPEGT | A    | V   | T | FATLAL    | YEWLGA | ---    | ---    | ---  | ---    | GDNV   | GIALRNS | -H    |         |
| CAB55348_Rumfl  | EDWVNAPSV | W    | M   | A | -         | LGMKHV | WDYVGI | ---    | ---  | ---    | SDHL   | AINIHKS | -H    |         |
| MZ0003_CDW92038 | DKWADPHGE | F    | L   | - | AAQADAV   | YRMLGT | GGLD   | AKKWPE | PNKL | VKSTIG | YHLR   |         |       |         |
| Consistency     | 448       | 766  | 485 | 4 | 507       | 647    | 654    | 7      | 766  | 7000   | 000000 | 4655    | 966   | 4465639 |

|                 |   |   |     |     |     |   |   |   |   |   |   |   |   |   |   |   |   |   |   |   |   |   |   |     |     |     |     |     |   |   |   |   |   |   |   |     |     |     |     |     |     |     |     |     |     |     |     |     |
|-----------------|---|---|-----|-----|-----|---|---|---|---|---|---|---|---|---|---|---|---|---|---|---|---|---|---|-----|-----|-----|-----|-----|---|---|---|---|---|---|---|-----|-----|-----|-----|-----|-----|-----|-----|-----|-----|-----|-----|-----|
| PcGE1_JGI300727 | C | A | W   | P   | --- | D | S | L | T | P | S | L | N | A | F | F | N | R | F | L | L | D | Q | -   | N   | V   | --- | D   | T | N | V | F | T | T | N | N   | Q   | F   | --- | --- | --- | G   | G   | A   |     |     |     |     |
| ScGE1_XP_003026 | C | Q | W   | P   | --- | S | Q | L | D | G | S | L | N | A | F | I | N | K | F | L | L | G | Q | -   | D   | V   | --- | S   | T | D | Y | F | E | S | N | N   | Q   | F   | --- | --- | --- | N   | G   | V   |     |     |     |     |
| PcGE2_JGI6482   | C | D | F   | P   | --- | S | S | L | N | P | T | L | F | A | F | F | D | K | F | L | L | G | K | -   | E   | A   | --- | N   | T | S | I | F | E | T | N | G   | L   | F   | --- | --- | --- | N   | G   | T   |     |     |     |     |
| CuGE_AIY68500   | C | A | W   | P   | --- | S | S | L | T | P | Q | L | N | A | F | I | N | K | F | L | L | D | Q | -   | S   | A   | --- | T   | T | N | V | F | T | T | N | N   | Q   | F   | --- | --- | --- | G   | K   | V   |     |     |     |     |
| WcGE1_JGI23632  | C | Y | F   | P   | --- | D | T | L | D | D | S | L | Y | A | F | F | D | R | F | L | L | D | E | D   | D   | V   | --- | S   | T | D | Y | F | T | T | N | Y   | Q   | F   | --- | --- | --- | N   | G   | T   |     |     |     |     |
| AaGE1_JGI107826 | C | S | F   | N   | --- | S | G | K | Q | S | A | E | L | N | A | F | I | N | K | F | L | L | Q | S   | G   | G   | --- | T   | T | S | I | L | R | T | E | R   | N   | H   | --- | --- | --- | G   | --- |     |     |     |     |     |
| Cip2_AAP57749   | C | A | F   | P   | --- | S | N | Q | Q | S | Q | L | T | A | F | V | Q | K | F | L | L | G | Q | -   | S   | T   | --- | N   | T | A | I | F | Q | S | D | -   | F   | S   | --- | --- | --- | --- | --- | --- |     |     |     |     |
| JGI40592_Oidma  | C | S | F   | P   | --- | S | N | Q | Q | S | Q | L | N | A | F | V | Q | Q | F | L | L | G | Q | -   | S   | A   | --- | N   | T | N | I | F | Q | S | D | -   | F   | T   | --- | --- | --- | --- | --- | --- |     |     |     |     |
| LfGE3_JGI349146 | C | G | F   | P   | --- | K | A | Q | Q | P | E | L | T | A | F | I | E | R | F | L | L | A | K | -   | D   | T   | --- | K   | T | D | V | W | K | T | D | -   | G   | K   | --- | --- | --- | F   | --- |     |     |     |     |     |
| CCA74892_Serin  | C | S | F   | P   | --- | S | S | Q | Q | T | E | L | T | A | F | V | Q | R | F | L | F | D | Q | S   | S   | A   | --- | N   | T | A | I | F | K | T | D | -   | G   | N   | --- | --- | --- | L   | --- |     |     |     |     |     |
| XP_01114526_Da  | C | A | F   | P   | --- | S | S | Q | Q | S | E | L | N | A | F | A | N | R | F | L | L | D | Q | -   | S   | V   | --- | A   | T | N | I | F | R | T | D | -   | G   | S   | --- | --- | --- | F   | --- |     |     |     |     |     |
| PaGE1_XP_001903 | C | S | F   | P   | --- | S | S | Q | Q | G | S | E | L | N | A | F | I | E | K | F | L | L | K | R   | S   | G   | --- | N   | T | N | I | F | R | S | T | Q   | T   | H   | --- | --- | --- | S   | --- |     |     |     |     |     |
| EGX47404_Artol  | C | G | F   | P   | --- | A | A | Q | Q | G | S | E | L | N | S | F | I | N | R | F | L | L | D | Q   | -   | S   | V   | --- | T | T | N | V | F | R | T | D   | -   | G   | N   | --- | --- | --- | F   | --- |     |     |     |     |
| KDQ19074_Botbo  | C | A | W   | P   | --- | T | S | L | T | P | T | L | N | A | F | F | D | K | F | L | L | G | K | S   | V   | N   | --- | T   | D | Y | F | T | T | N | S | V   | F   | G   | --- | --- | --- | P   | A   | --- |     |     |     |     |
| KDQ11090_Botbo  | C | A | W   | P   | --- | S | S | L | T | P | T | L | N | A | F | F | D | K | F | L | F | G | K | N   | V   | N   | --- | T   | D | F | F | S | T | N | N | V   | F   | G   | --- | --- | --- | P   | A   | --- |     |     |     |     |
| PcGCE_JGI247750 | C | E | F   | P   | --- | S | D | L | N | P | T | L | F | A | F | F | D | K | F | L | L | G | K | E   | A   | N   | --- | T   | T | I | F | E | T | N | E | V   | F   | N   | --- | --- | --- | G   | T   | --- |     |     |     |     |
| JGI392659_Cerun | C | A | F   | P   | --- | S | T | L | N | D | Q | L | F | S | F | I | D | R | F | L | L | N | E | P   | A   | N   | --- | T   | T | V | F | T | T | N | D | V   | F   | N   | --- | --- | --- | N   | V   | --- |     |     |     |     |
| ANB15160_Sugli  | C | S | F   | P   | --- | T | D | D | Q | G | A | E | L | Q | A | F | Y | N | K | F | L | L | D | E   | N   | V   | N   | --- | T | N | V | F | R | T | N | --- | G   | --- | --- | --- | --- | G   | Y   | --- |     |     |     |     |
| XP_007585921_Ne | C | S | F   | P   | --- | S | A | Q | Q | P | E | L | S | A | F | I | D | K | Y | L | L | K | G | S   | S   | S   | --- | T   | A | N | I | E | K | S | N | --- | Q   | --- | --- | --- | --- | --- | --- | --- | --- |     |     |     |
| NcGE_NCU09445   | C | Q | F   | P   | --- | S | S | Q | Q | S | E | L | T | S | Y | I | N | Y | F | L | L | K | A | G   | T   | A   | --- | P   | G | A | V | E | R | S | S | --- | A   | --- | --- | --- | --- | --- | --- | --- | --- |     |     |     |
| JGI7888_Podan   | C | Q | F   | P   | --- | S | G | Q | Q | N | S | E | L | N | Q | Y | I | N | Y | F | L | L | K | S   | G   | T   | A   | --- | P | G | S | V | E | R | S | T   | --- | S   | --- | --- | --- | --- | --- | --- | --- | --- |     |     |
| XP_003844265_Le | C | S | F   | P   | --- | S | N | Q | Q | T | E | L | T | A | F | I | N | K | F | L | L | G | Q | S   | S   | N   | --- | T   | A | N | I | E | K | G | P | --- | S   | --- | --- | --- | --- | --- | --- | --- | --- | --- |     |     |
| XP_018385058_Al | C | Q | F   | P   | --- | S | N | Q | Q | A | D | L | T | A | F | I | N | K | F | L | L | G | Q | S   | S   | N   | --- | T   | A | N | I | E | K | G | P | --- | S   | --- | --- | --- | --- | --- | --- | --- | --- | --- | --- |     |
| SNOG_09306_Parn | C | S | F   | P   | --- | S | N | Q | Q | A | D | L | T | A | F | I | N | K | F | L | L | N | Q | -   | S   | A   | --- | E   | T | N | I | E | K | G | P | --- | A   | --- | --- | --- | --- | --- | --- | --- | --- | --- | --- |     |
| Rhyrul_111612   | C | Q | F   | P   | --- | S | S | Q | Q | A | D | L | T | A | F | F | N | K | F | L | L | G | G | -   | T   | G   | --- | N   | T | D | V | E | K | S | P | --- | A   | --- | --- | --- | --- | --- | --- | --- | --- | --- |     |     |
| XP_008084971_G1 | C | L | F   | P   | --- | D | S | Q | Q | K | P | Q | L | E | A | F | V | K | K | W | L | F | D | K   | E   | V   | D   | --- | T | D | G | V | F | V | T | S   | --- | R   | --- | --- | --- | --- | --- | --- | --- | --- |     |     |
| XP_008087696_G1 | C | T | F   | P   | --- | S | S | Q | Q | T | E | L | T | A | F | I | N | R | F | L | K | G | D | A   | S   | A   | --- | K   | T | A | G | V | D | K | S | --- | D   | --- | --- | --- | --- | --- | Q   | A   | --- |     |     |     |
| Rhyrul_116370   | C | G | F   | P   | --- | S | A | Q | Q | P | E | L | T | A | F | I | N | R | F | L | L | N | Q | -   | T   | A   | --- | D   | T | N | V | F | K | T | D | --- | G   | --- | --- | --- | --- | --- | --- | K   | F   | --- |     |     |
| XP_018132613_Ps | C | S | F   | P   | --- | S | S | Q | Q | A | D | L | T | A | F | V | Q | K | F | L | F | D | Q | -   | N   | T   | --- | N   | T | A | V | S | K | S | D | --- | Q   | --- | --- | --- | --- | --- | --- | --- | --- | --- | --- |     |
| JGI99197_Aspfu  | C | S | F   | P   | --- | D | Q | Q | Q | R | E | D | L | F | A | F | I | N | R | F | L | L | G | M   | -   | E   | V   | --- | N | T | T | V | Q | K | N | Y   | --- | A   | --- | --- | --- | --- | --- | --- | G   | I   | --- |     |
| Pc13g07350_Penr | C | S | F   | P   | --- | D | Q | Q | Q | R | G | D | L | F | A | F | I | N | R | F | M | L | G | M   | -   | E   | V   | --- | N | T | T | V | Q | K | N | Y   | --- | A   | --- | --- | --- | --- | --- | --- | --- | G   | I   | --- |
| LfGE2_JGI311197 | C | Q | F   | P   | --- | S | N | Q | Q | S | D | L | T | A | Y | I | N | K | F | L | L | N | Q | D   | A   | N   | --- | T   | A | N | I | E | K | G | P | --- | --- | --- | --- | --- | --- | --- | --- | --- | --- | --- | --- | --- |
| StGE2_JGI230838 | C | Q | F   | P   | --- | S | S | Q | Q | N | Q | D | L | N | S | Y | I | N | Y | F | L | L | G | Q   | G   | S   | P   | --- | S | G | V | E | H | S | D | V   | --- | --- | --- | --- | --- | --- | --- | --- | --- | --- | --- | --- |
| MGG_03128_Magor | C | Q | F   | P   | --- | S | A | T | T | A | N | L | N | S | Y | I | N | R | F | L | L | G | T | G   | Q   | T   | --- | N   | N | V | E | T | S | R | A | --- | --- | --- | --- | --- | --- | --- | --- | --- | --- | --- | --- | --- |
| AOA090CBG6_Poda | C | D | --- | --- | M   | S | G | F | N | G | I | L | P | F | V | Q | K | I | F | F | N | T | T | T   | R   | N   | --- | F   | H | S | L | G | T | Y | N | -   | T   | P   | --- | --- | --- | --- | --- | --- | L   | A   | --- |     |
| MYCTH_96309_Myc | C | D | --- | --- | L   | S | G | Y | T | A | I | L | P | V | Q | K | I | F | F | G | T | P | T | D   | K   | D   | --- | Y   | N | N | L | G | S | Y | G | -   | S   | P   | --- | --- | --- | --- | --- | --- | V   | S   | --- |     |
| CBX90574_Lepma  | C | D | --- | --- | Q   | N | G | Y | A | D | V | L | P | F | V | Q | K | V | L | Q | G | K | S | T   | R   | D   | --- | Y   | D | D | L | K | T | W | K | A   | M   | P   | --- | --- | --- | --- | --- | --- | E   | A   | Y   | --- |
| OBZ79634_Grifr  | C | D | --- | --- | I   | S | G | Y | T | N | I | Q | D | F | M | N | K | I | F | F | N | E | K | I   | T   | R   | N   | --- | Y | S | D | I | S | P | Y | -   | T   | P   | --- | --- | --- | --- | --- | --- | Y   | T   | E   | --- |
| LfGE1_JGI384728 | C | D | --- | --- | M   | S | G | Y | A | D | V | L | P | F | V | Q | K | I | L | Q | G | K | T | T   | R   | N   | --- | Y   | D | D | L | G | S | W | - | K   | A   | --- | --- | --- | --- | --- | --- | M   | P   | --- |     |     |
| KDQ18272_Botbo  | C | D | --- | --- | N   | A | G | F | T | N | V | Q | G | F | M | N | K | I | F | F | G | K | T | P   | S   | K   | N   | --- | Y | D | S | T | S | P | Y | -   | T   | A   | --- | --- | --- | --- | --- | --- | H   | T   | --- |     |
| ScGE2_JGI251746 | C | D | --- | --- | S   | G | N | T | N | V | A | D | F | I | N | K | F | I | F | G | T | E | T | --- | --- | --- | --- |     |   |   |   |   |   |   |   |     |     |     |     |     |     |     |     |     |     |     |     |     |



## References

- Berka RM, Grigoriev I V, Otiillar R, Salamov A, Grimwood J, Reid I, Ishmael N, John T, Darmond C, Moisan M-C, Henrissat B, Coutinho PM, Lombard V, Natvig DO, Lindquist E, Schmutz J, Lucas S, Harris P, Powlowski J, Bellemare A, Taylor D, Butler G, de Vries RP, Allijn IE, van den Brink J, Ushinsky S, Storms R, Powell AJ, Paulsen IT, Elbourne LDH, Baker SE, Magnuson J, LaBoissiere S, Clutterbuck AJ, Martinez D, Wogulis M, de Leon AL, Rey MW, Tsang A (2011) Comparative genomic analysis of the thermophilic biomass-degrading fungi *Myceliophthora thermophila* and *Thielavia terrestris*. *Nat Biotech* 29:922–927.
- Biely P, Malovíková A, Uhliaríková I, Li XL, Wong DWS (2015) Glucuronoyl esterases are active on the polymeric substrate methyl esterified glucuronoxylan. *FEBS Lett* 589:2334–2339. doi: 10.1016/j.febslet.2015.07.019
- D'Errico C, Jørgensen JO, Krogh KBRM, Spodsberg N, Madsen R, Monrad RN (2015) Enzymatic degradation of lignin-carbohydrate complexes (LCCs): Model studies using a fungal glucuronoyl esterase from *Cerrena unicolor*. *Biotechnol Bioeng* 112:914–922. doi: 10.1002/bit.25508
- De Santi C, Willassen NP, Williamson A (2016) Biochemical Characterization of a Family 15 Carbohydrate Esterase from a Bacterial Marine Arctic Metagenome. *PLoS One* 11:e0159345. doi: 10.1371/journal.pone.0159345
- Ďuranová M, Hirsch J, Kolenová K, Biely P (2009a) Fungal Glucuronoyl Esterases and Substrate Uronic Acid Recognition. *Biosci Biotechnol Biochem* 73:2483–2487. doi: 10.1271/bbb.90486
- Ďuranová M, Špáníková S, Wösten HAB, Biely P, de Vries RP (2009b) Two glucuronoyl esterases of *Phanerochaete chrysosporium*. *Arch Microbiol* 191:133–40. doi: 10.1007/s00203-008-0434-y
- Espagne E, Lespinet O, Malagnac F, Da Silva C, Jaillon O, Porcel BM, Couloux A, Aury J-M, Ségurens B, Poulain J, Anthouard V, Grossetete S, Khalili H, Coppin E, Déquard-Chablat M, Picard M, Contamine V, Arnaise S, Bourdais A, Berteaux-Lecellier V, Gautheret D, de Vries RP, Battaglia E, Coutinho PM, Danchin EGJ, Henrissat B, Houry REL, Sainsard-Chanet A, Boivin A, Pinan-Lucarré B, Sellem CH, Debuchy R, Wincker P, Weissenbach J, Silar P (2008) The genome sequence of the model ascomycete fungus *Podospora anserina*. *Genome Biol* 9:R77–R77. doi: 10.1186/gb-2008-9-5-r77
- Floudas D, Binder M, Riley R, Barry K, Blanchette RA, Henrissat B, Martínez AT, Otiillar R, Joseph W, Spatafora, 6 Jagjit S. Yadav, 7 Andrea Aerts, 2 Isabelle Benoit, 8, 9 Alex Boyd, 6 Alexis Carlson, 1 Alex 2\* David S. Hibbett1\* (2012) The Paleozoic Origin of Enzymatic from 31 Fungal Genomes. *Science* (80- ) 336:1715–1719.
- Huynh HH, Arioka M (2016) Functional expression and characterization of a glucuronoyl esterase from the fungus *Neurospora crassa*: identification of novel consensus sequences containing the catalytic triad. *J Gen Appl Microbiol* 1–8. doi: 10.2323/jgam.2016.03.004
- Katsimpouras C, Bénarouche A, Navarro D, Karpusas M, Dimarogona M, Berrin J-G, Christakopoulos P, Topakas E (2014) Enzymatic synthesis of model substrates recognized by glucuronoyl esterases from *Podospora anserina* and *Myceliophthora*

- thermophila. *Appl Microbiol Biotechnol* 98:5507–16. doi: 10.1007/s00253-014-5542-9
- Kohler A, Kuo A, Nagy LG, Morin E, Barry KW, Buscot F, Canbäck B, Choi C, Cichocki N, Clum A, Colpaert J, Copeland A, Costa MD, Doré J, Floudas D, Gay G, Girlanda M, Henrissat B, Herrmann S, Hess J, Högberg N, Johansson T, Khouja H-R, LaButti K, Lahrman U, Levasseur A, Lindquist EA, Lipzen A, Marmeisse R, Martino E, Murat C, Ngan CY, Nehls U, Plett JM, Pringle A, Ohm RA, Perotto S, Peter M, Riley R, Rineau F, Ruytinx J, Salamov A, Shah F, Sun H, Tarkka M, Tritt A, Veneault-Fourrey C, Zuccaro A, Tunlid A, Grigoriev I V, Hibbett DS, Martin F (2015) Convergent losses of decay mechanisms and rapid turnover of symbiosis genes in mycorrhizal mutualists. *Nat Genet* 47:410–5. doi: 10.1038/ng.3223
- Li X-L, Spániková S, de Vries RP, Biely P (2007) Identification of genes encoding microbial glucuronoyl esterases. *FEBS Lett* 581:4029–35. doi: 10.1016/j.febslet.2007.07.041
- Martinez D, Larrondo LF, Putnam N, Gelpke MDS, Huang K, Chapman J, Helfenbein KG, Ramaiya P, Detter JC, Larimer F, Coutinho PM, Henrissat B, Berka R, Cullen D, Rokhsar D (2004) Genome sequence of the lignocellulose degrading fungus *Phanerochaete chrysosporium* strain RP78. *Nat Biotechnol* 22:695–700. doi: 10.1038/nbt967
- Nierman WC, Pain A, Anderson MJ, Wortman JR, Kim HS, Arroyo J, Berriman M, Abe K, Archer DB, Bermejo C, Bennett J, Bowyer P, Chen D, Collins M, Coulsen R, Davies R, Dyer PS, Farman M, Fedorova N, Fedorova N, Feldblyum T V, Fischer R, Fosker N, Fraser A, Garcia JL, Garcia MJ, Goble A, Goldman GH, Gomi K, Griffith-Jones S, Gwilliam R, Haas B, Haas H, Harris D, Horiuchi H, Huang J, Humphray S, Jimenez J, Keller N, Khouri H, Kitamoto K, Kobayashi T, Konzack S, Kulkarni R, Kumagai T, Lafton A, Latge J-P, Li W, Lord A, Lu C, Majoros WH, May GS, Miller BL, Mohamoud Y, Molina M, Monod M, Mouyna I, Mulligan S, Murphy L, O’Neil S, Paulsen I, Penalva MA, Perteu M, Price C, Pritchard BL, Quail MA, Rabbinowitsch E, Rawlins N, Rajandream M-A, Reichard U, Renauld H, Robson GD, de Cordoba SR, Rodriguez-Pena JM, Ronning CM, Rutter S, Salzberg SL, Sanchez M, Sanchez-Ferrero JC, Saunders D, Seeger K, Squares R, Squares S, Takeuchi M, Tekaiia F, Turner G, de Aldana CRV, Weidman J, White O, Woodward J, Yu J-H, Fraser C, Galagan JE, Asai K, Machida M, Hall N, Barrell B, Denning DW (2005) Genomic sequence of the pathogenic and allergenic filamentous fungus *Aspergillus fumigatus*. *Nature* 438:1151–1156.
- Ohm R a, de Jong JF, Lugones LG, Aerts A, Kothe E, Stajich JE, de Vries RP, Record E, Levasseur A, Baker SE, Bartholomew K a, Coutinho PM, Erdmann S, Fowler TJ, Gathman AC, Lombard V, Henrissat B, Knabe N, Kües U, Lilly WW, Lindquist E, Lucas S, Magnuson JK, Piumi F, Raudaskoski M, Salamov A, Schmutz J, Schwarze FWMR, vanKuyk P a, Horton JS, Grigoriev I V, Wösten H a B (2010) Genome sequence of the model mushroom *Schizophyllum commune*. *Nat Biotechnol* 28:957–963. doi: 10.1038/nbt.1643
- Simossis VA, Heringa J (2005) PRALINE: A multiple sequence alignment toolbox that integrates homology-extended and secondary structure information. *Nucleic Acids Res* 33:289–294. doi: 10.1093/nar/gki390
- Topakas E, Moukouli M, Dimarogona M, Vafiadi C, Christakopoulos P (2010) Functional expression of a thermophilic glucuronoyl esterase from *Sporotrichum thermophile*:



identification of the nucleophilic serine. *Appl Microbiol Biotechnol* 87:1765–72. doi: 10.1007/s00253-010-2655-7

Tsai AY-L, Canam T, Gorzsás A, Mellerowicz EJ, Campbell MM, Master ER (2012) Constitutive expression of a fungal glucuronoyl esterase in *Arabidopsis* reveals altered cell wall composition and structure. *Plant Biotechnol J* 10:1077–87. doi: 10.1111/j.1467-7652.2012.00735.x

Wong DWS, Chan VJ, McCormack A a, Hirsch J, Biely P (2012) Functional Cloning and Expression of the *Schizophyllum commune* Glucuronoyl Esterase Gene and Characterization of the Recombinant Enzyme. *Biotechnol Res Int* 2012:951267. doi: 10.1155/2012/951267

Wiśniewski JR, Zougman A, Nagaraj N, Mann M (2009) Universal sample preparation method for proteome analysis. *Nat Methods* 6:359–62. doi: 10.1038/nmeth.1322
